# Supplementary material
Source: publisher site journal article supplement (https://www.dovepress.com/article/389853)
Supplement: Supplementary file 1 [file get_supplementary_file.php]

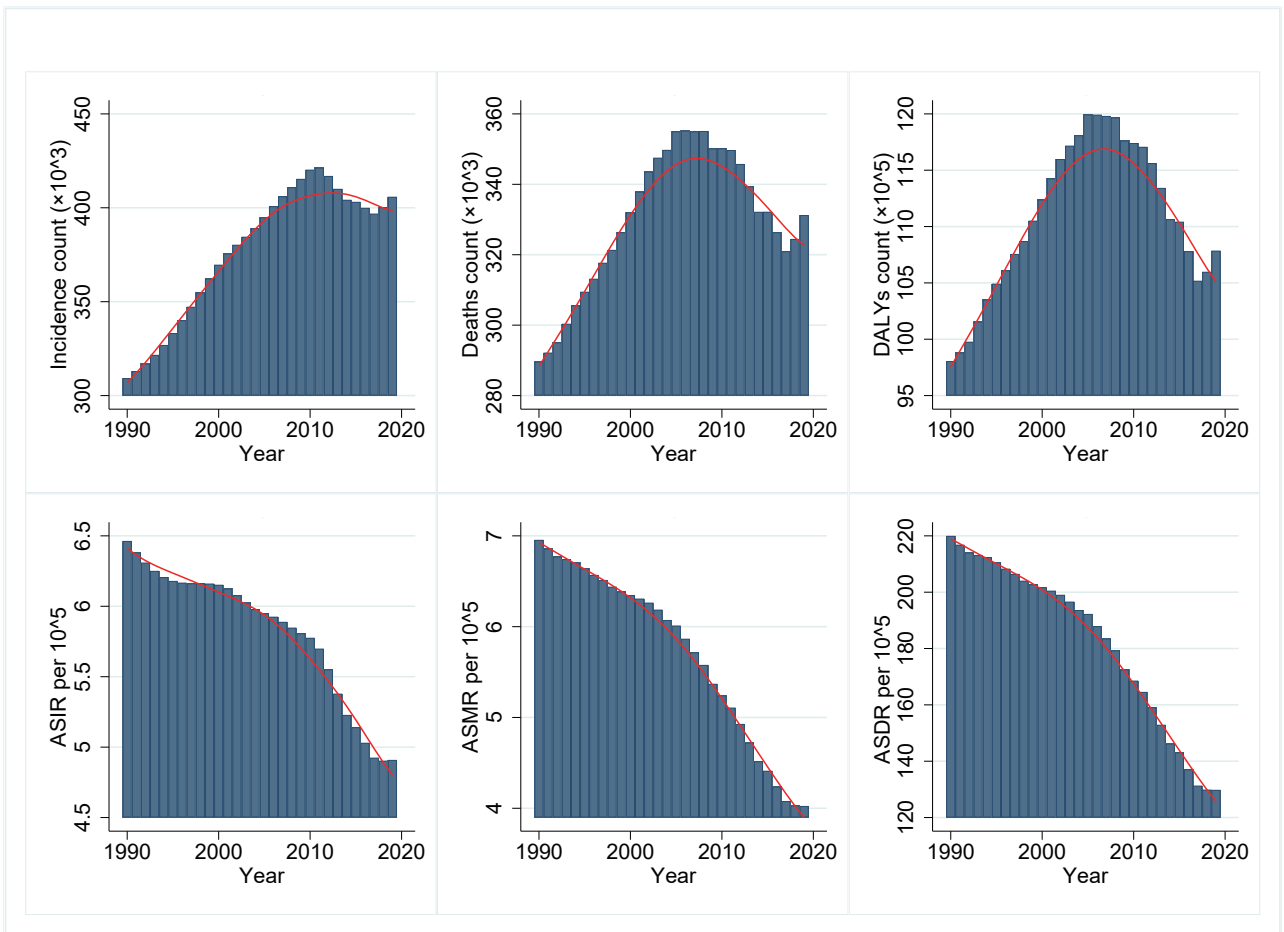

Figure S1 Global temporal patterns of cirrhosis and other chronic liver diseases due to hepatitis B, 1990–2019.

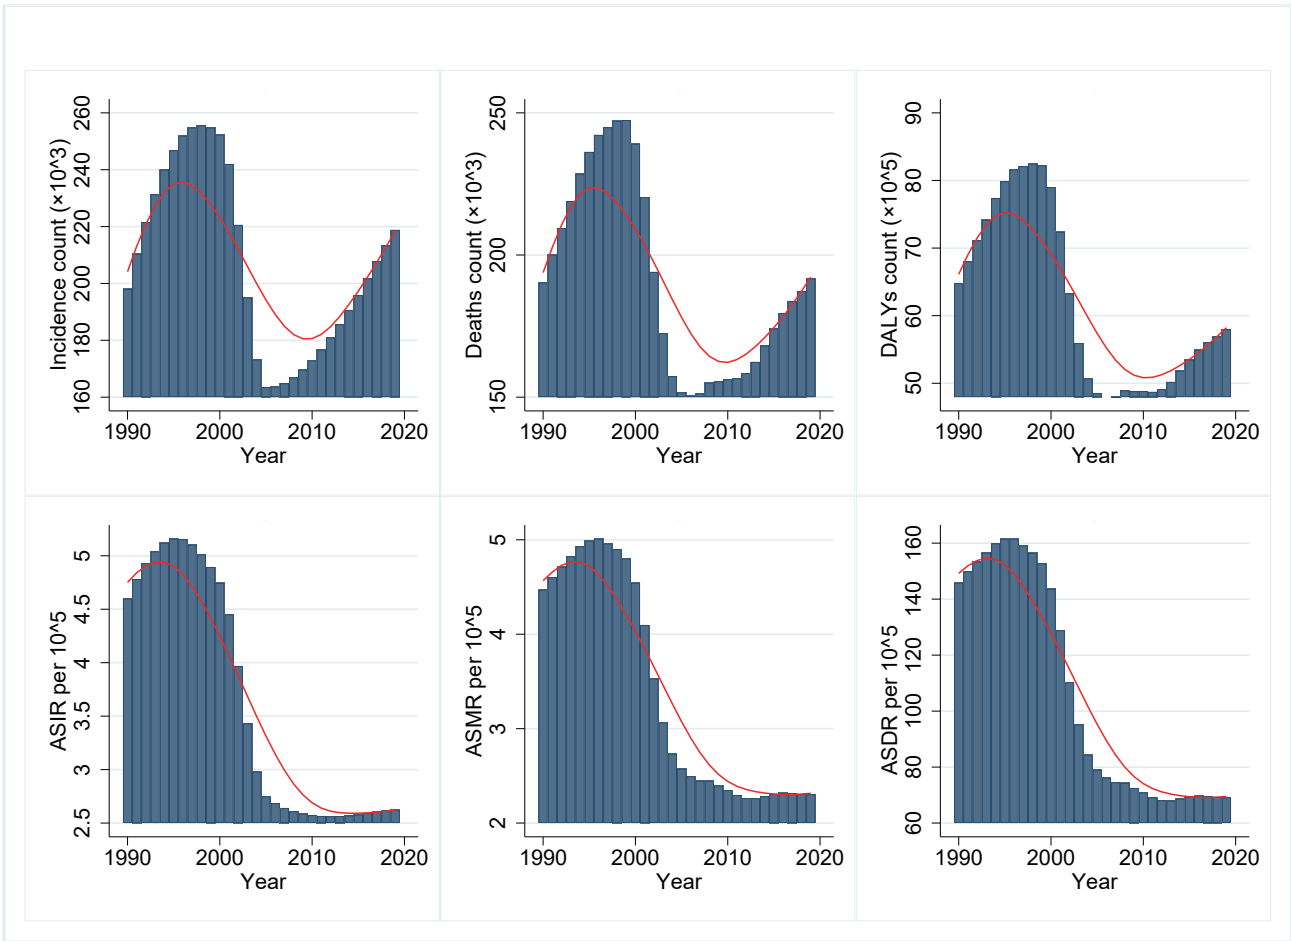

Figure S2 Global temporal patterns of liver cancer due to hepatitis B, 1990–2019.

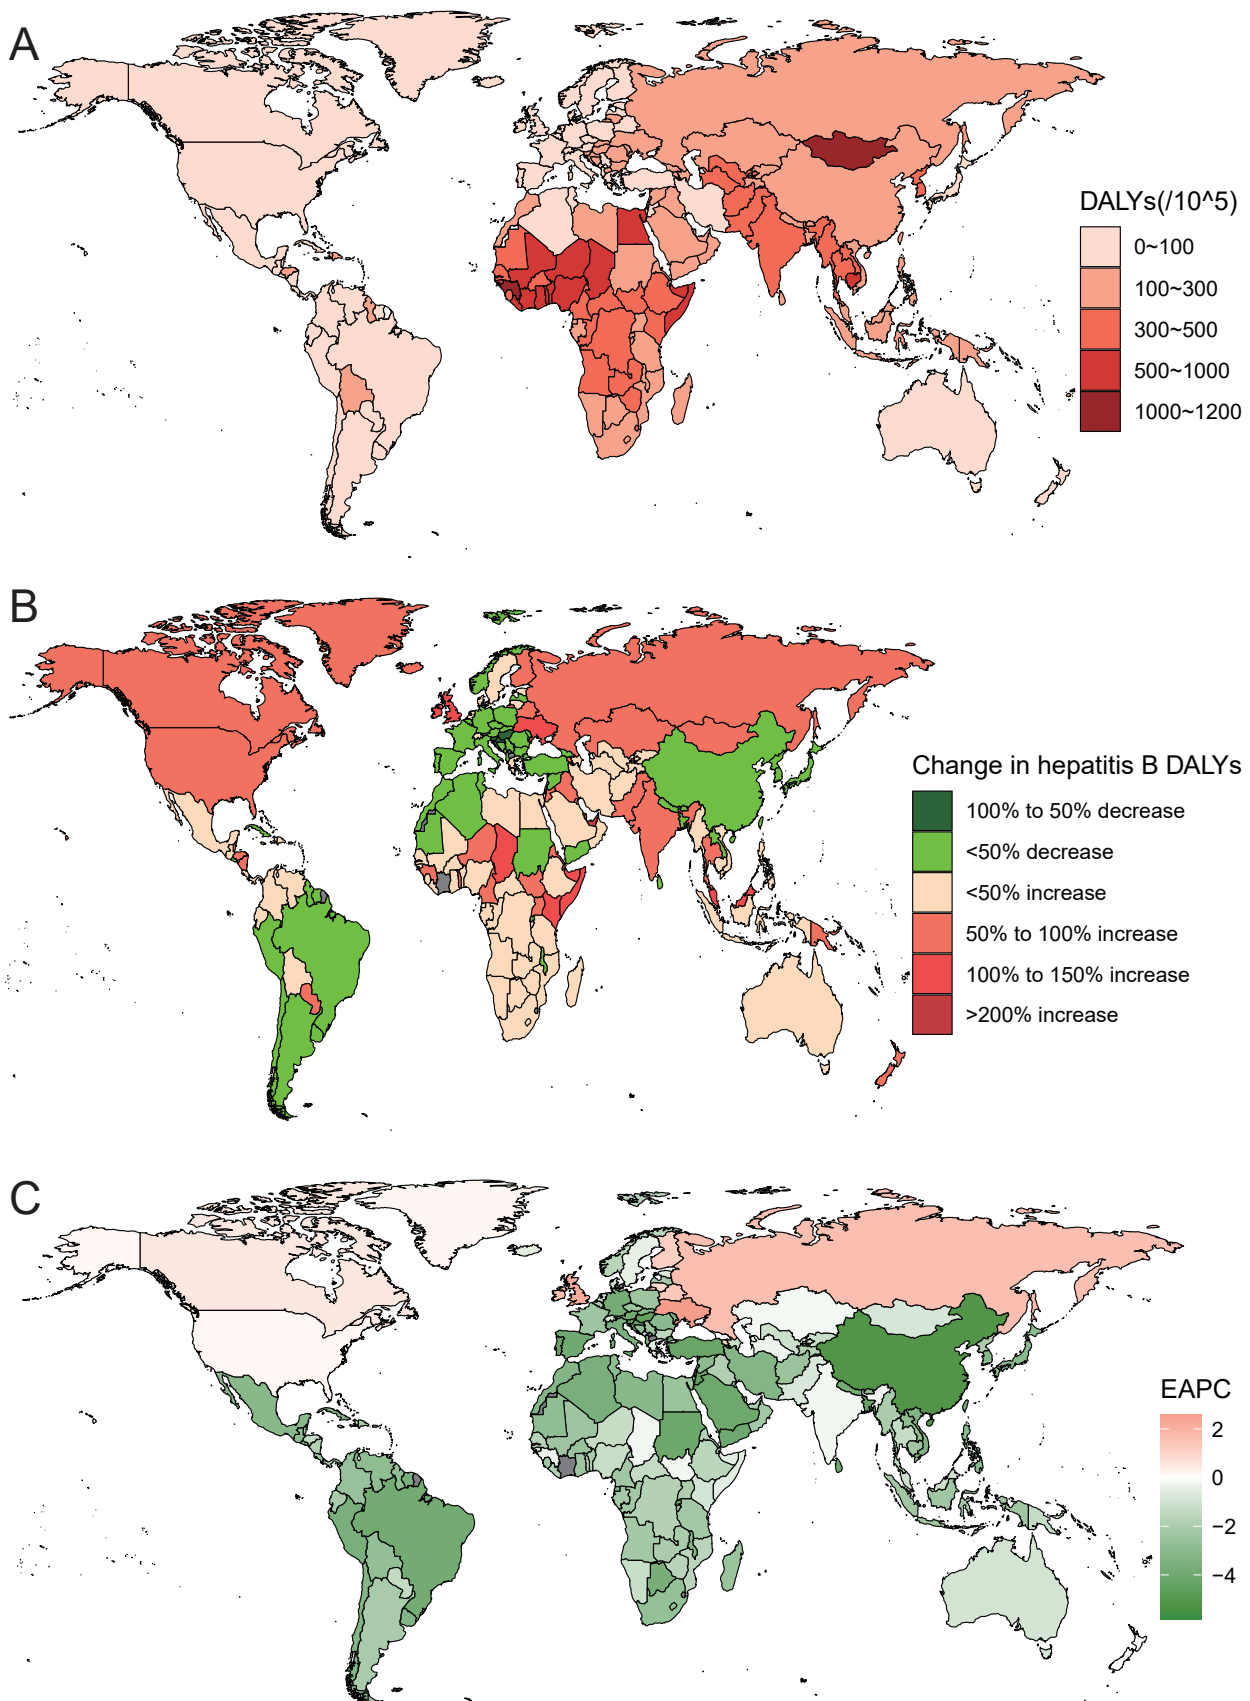

Figure S3 Geographical distribution of global disease burden of hepatitis B DALYs in all countries and territories.

(A) ASDR of hepatitis B in 2019;

(B) The relative change in DALYs counts of hepatitis B between 1990 and 2019;

(C) The EAPC of hepatitis B ASDR from 1990 to 2019.

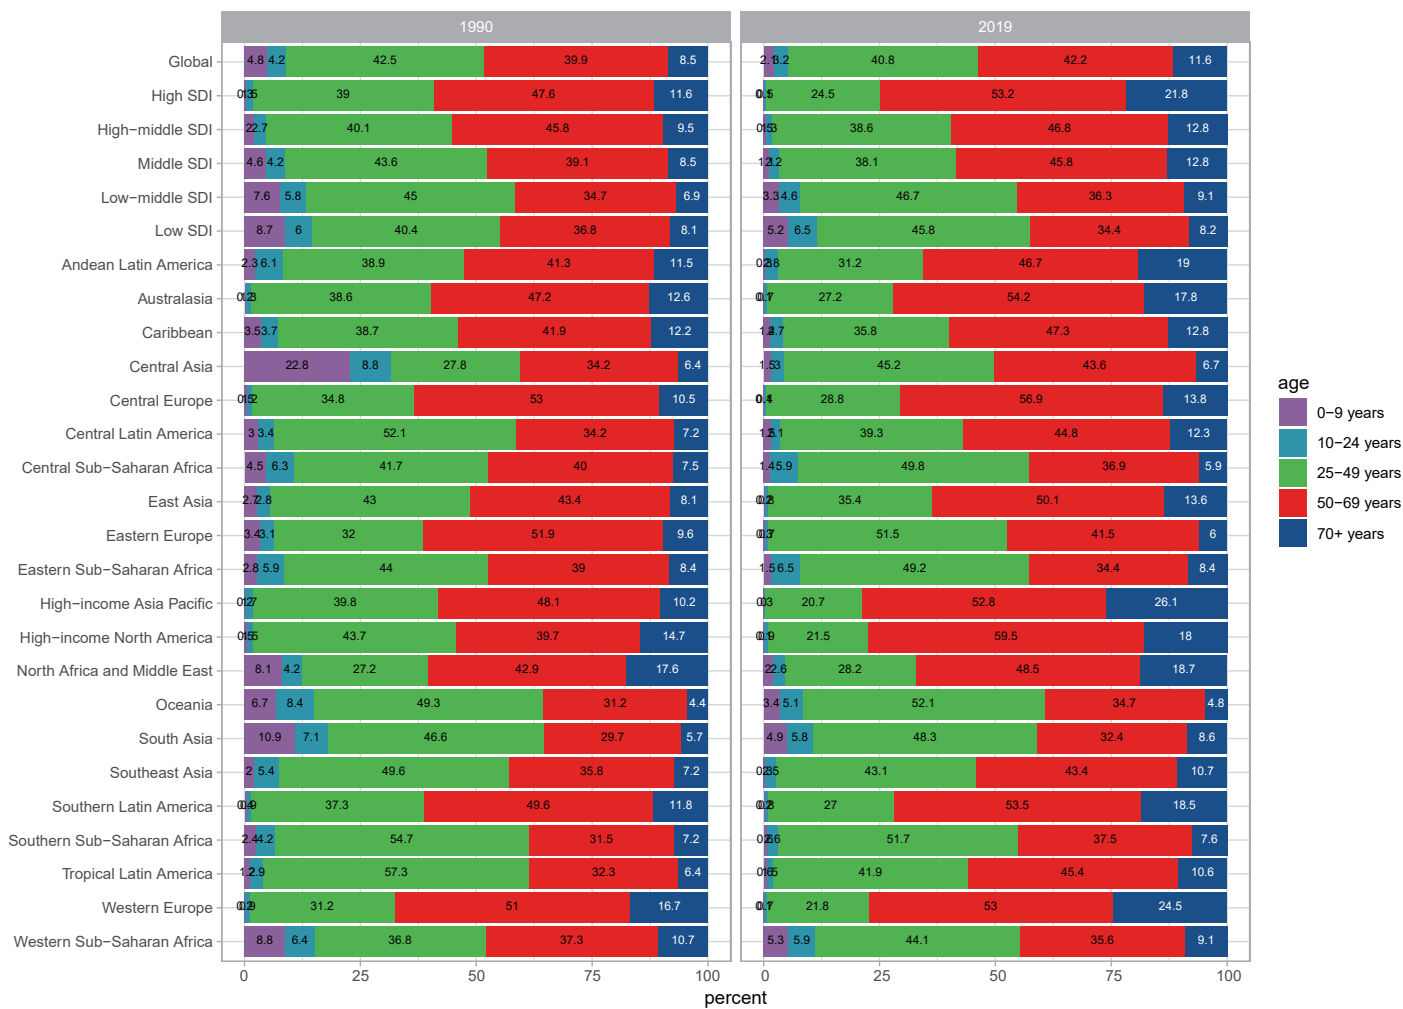

Figure S4 Age distribution of DALYs counts of hepatitis B by globally and region in 1990 and 2019.

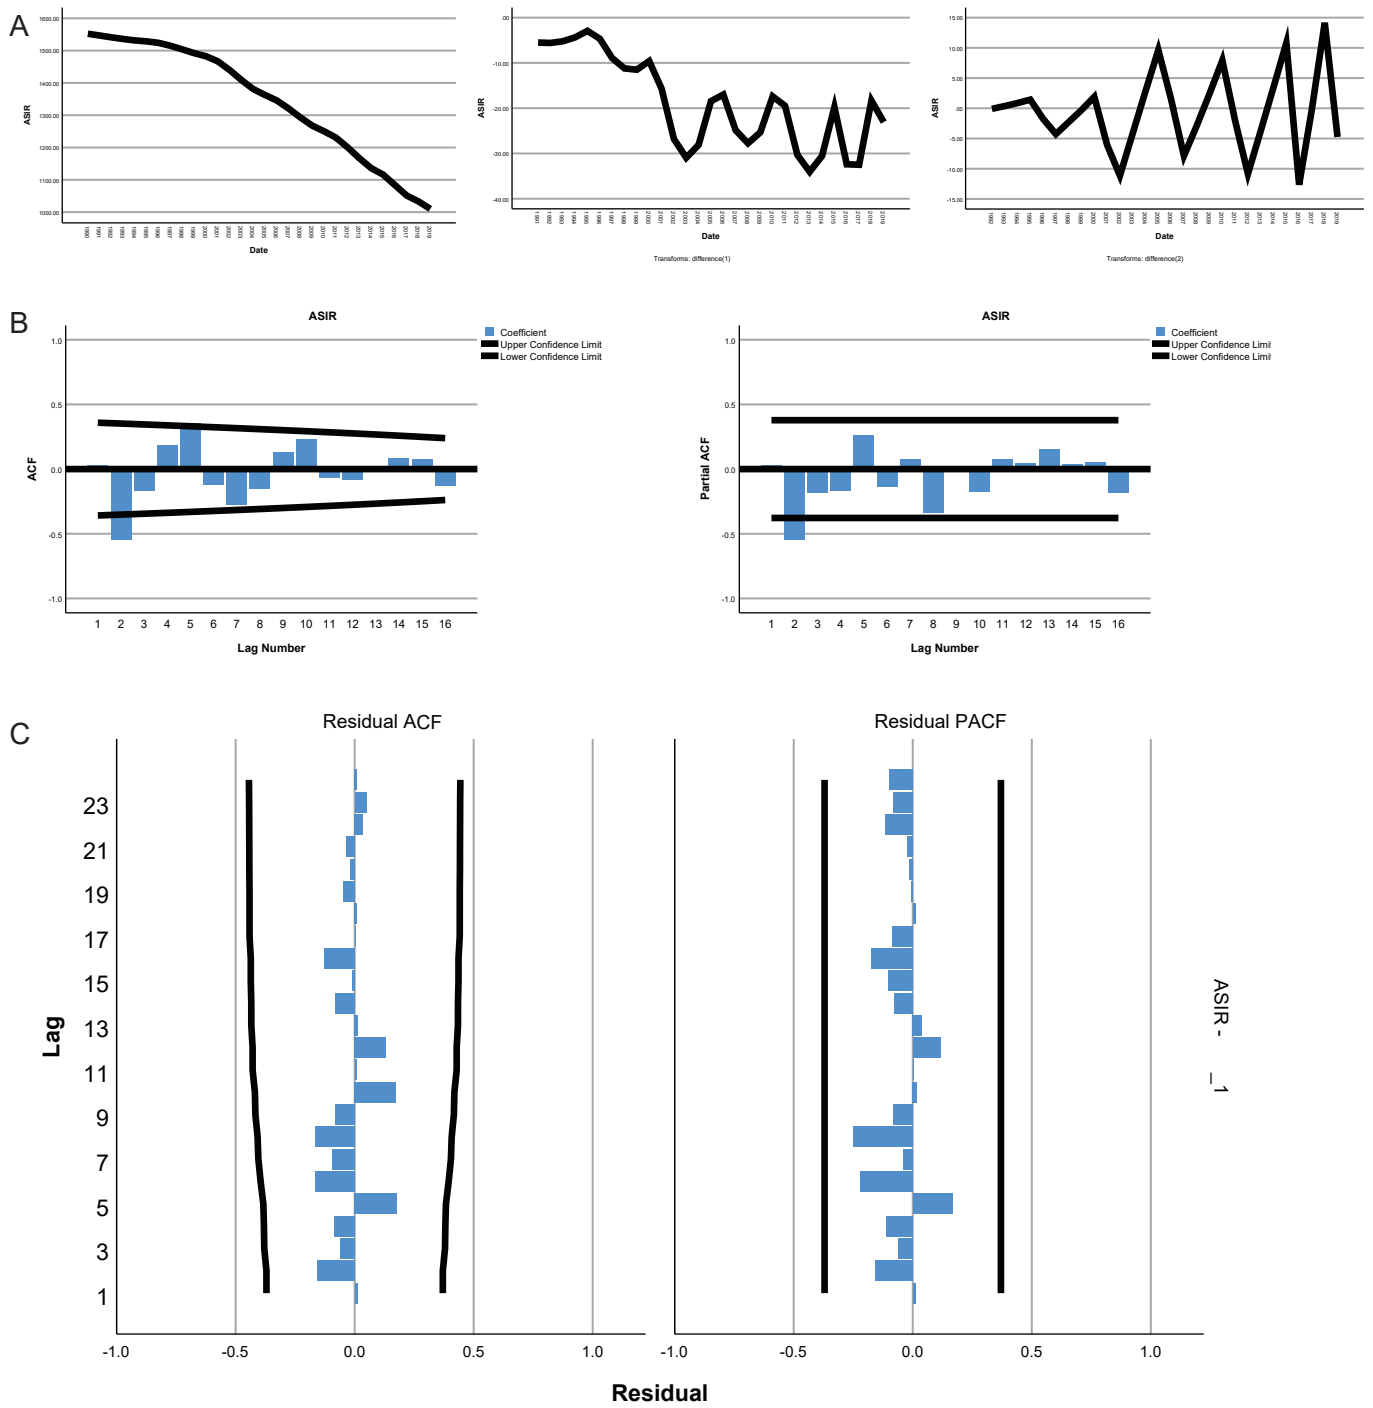

Figure S5 ASIR time series analysis.

(A) ASIR differential transform timing diagram, in order of difference-0, -1, and -2 transforms;

(B) ACF and PACF plots of ARIMA (2,2,0) model;

(C) ACF and PACF plots of the residuals. ACF: autocorrelation function

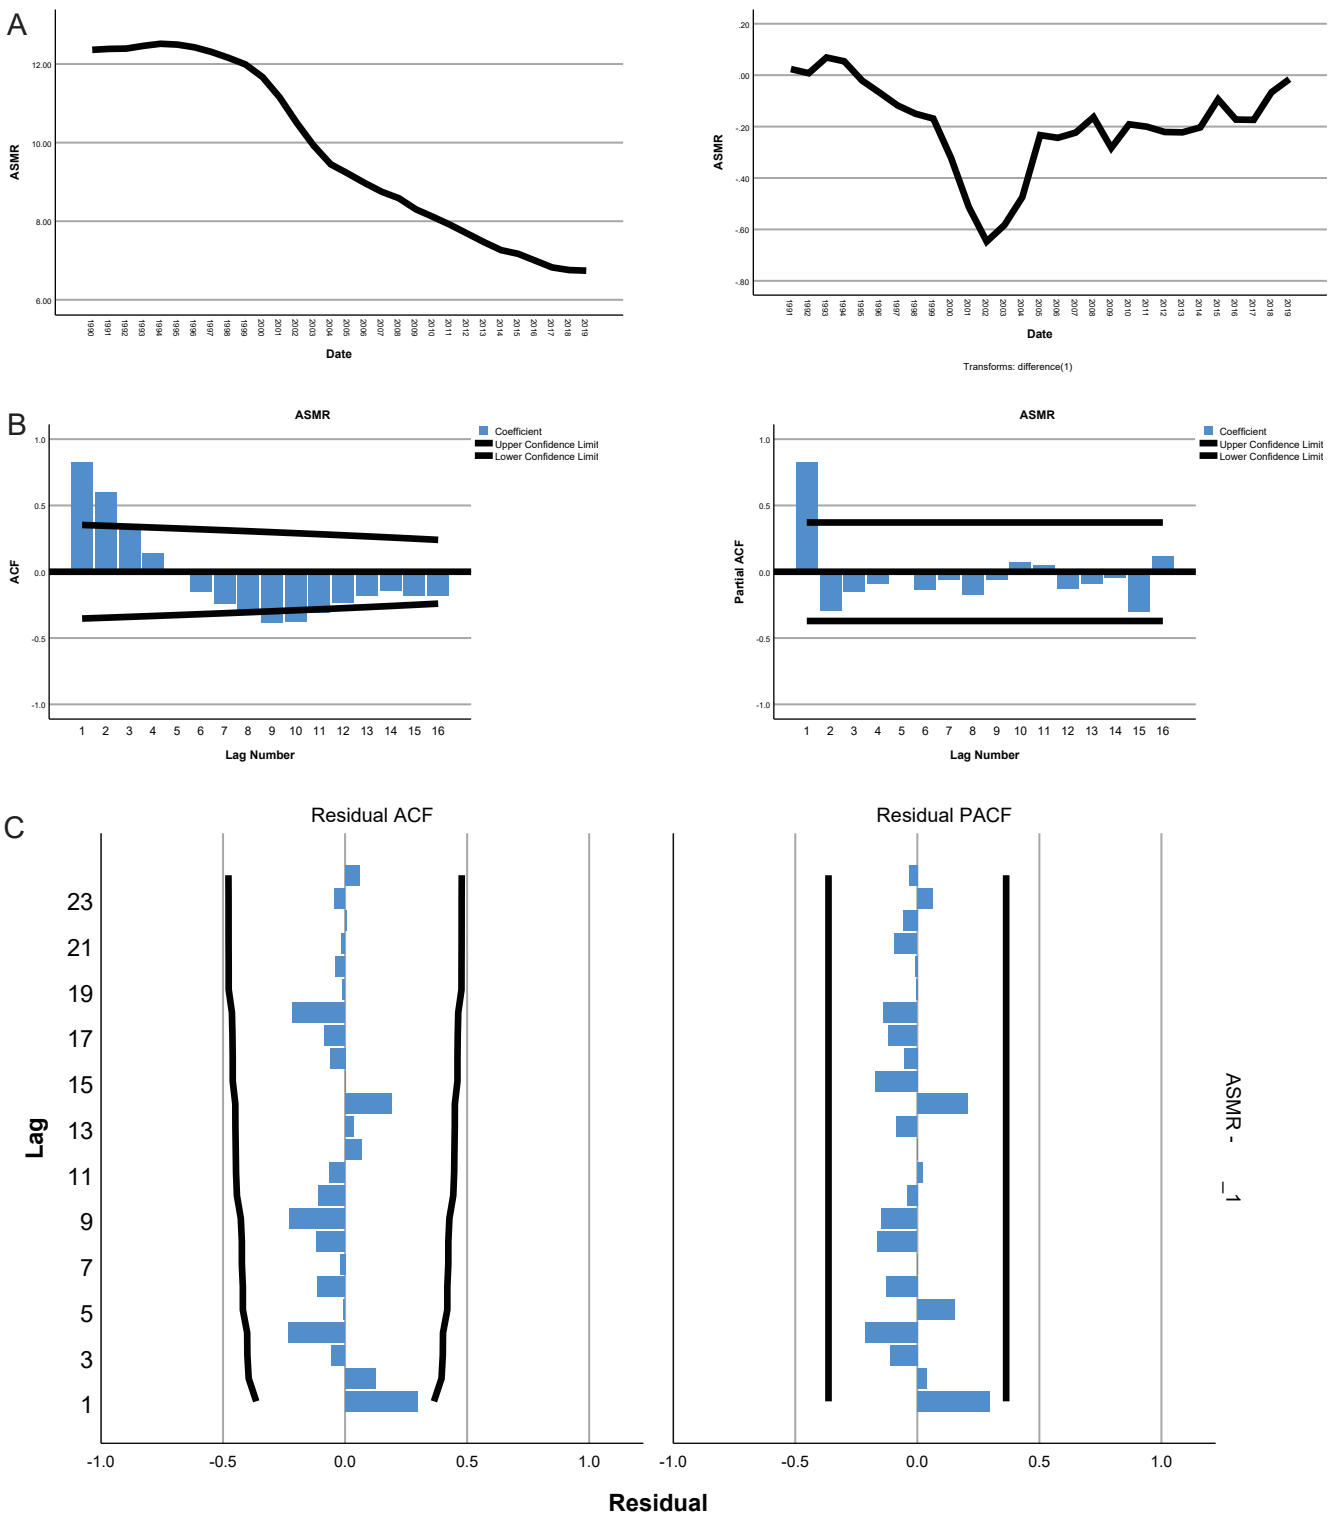

Figure S6 ASMR time series analysis.

(A) ASMR differential transform timing diagram, in order of difference-0, and -1 transforms;

(B) ACF and PACF plots of ARIMA (1,1,0) model;

(C) ACF and PACF plots of the residuals. ACF: autocorrelation function

**Table S1** Region-wise incidence of hepatitis B

| location        | Num_1990 (No. ×10 <sup>5</sup> ) | ASR_1990               | Num_2019 (No. ×10 <sup>5</sup> ) | ASR_2019              | EAPC_CI             | Num_change% |
|-----------------|----------------------------------|------------------------|----------------------------------|-----------------------|---------------------|-------------|
| Global          | 844.5 (693.8-1010.3)             | 1552.2 (1288.3-1842.4) | 806.5 (646.6-990.7)              | 1010 (811.7-1234.1)   | -1.52 (-1.66--1.38) | -4.5        |
| High SDI        | 51.6 (43.2-60.6)                 | 621.6 (525.9-726.7)    | 42 (34.3-50.1)                   | 364.6 (299.2-435.8)   | -1.75 (-1.83--1.66) | -18.6       |
| High-middle SDI | 158.4 (128.4-189.3)              | 1341.4 (1094.7-1597.7) | 119.2 (89.1-151)                 | 722.5 (542.7-910.5)   | -2.2 (-2.47--1.94)  | -24.7       |
| Middle SDI      | 353.6 (289.8-424.5)              | 2043.5 (1700.1-2442.3) | 286.9 (225-353)                  | 1106.1 (870.8-1353.6) | -2.12 (-2.26--1.97) | -18.9       |
| Low-middle SDI  | 173 (142.1-209.3)                | 1546.1 (1256.9-1857.3) | 193.3 (155.2-236.1)              | 1084.2 (874.3-1320.5) | -1.25 (-1.34--1.16) | 11.7        |
| Low SDI         | 107.6 (89-129.3)                 | 2067.2 (1724-2459)     | 164.7 (134.6-200.3)              | 1580.3 (1294.6-1913)  | -0.96 (-1.07--0.84) | 53.1        |
| Andean America  | Latin 1.1 (1-1.3)                | 318.2 (278.6-363.6)    | 1.6 (1.4-1.9)                    | 257.4 (221.9-297.8)   | -0.72 (-0.8--0.64)  | 45.5        |
| Australasia     | 1.9 (1.5-2.2)                    | 892.7 (739.8-1061.9)   | 1.8 (1.5-2.3)                    | 549.1 (440.2-663.6)   | -1.54 (-1.62--1.45) | -5.3        |
| Caribbean       | 0.9 (0.7-1.1)                    | 251.7 (201.2-305.8)    | 1 (0.8-1.3)                      | 214.6 (162.2-267.4)   | -0.6 (-0.73--0.47)  | 11.1        |
| Central Asia    | 8.5 (6.5-10.6)                   | 1218.6 (937.6-1509.9)  | 8.3 (6.5-10.6)                   | 851.1 (663.5-1077.4)  | -1.26 (-1.44--1.08) | -2.4        |
| Central Europe  | 5.1 (4.4-5.9)                    | 411.6 (353.3-475.3)    | 2.6 (2.2-3.2)                    | 199.9 (165.6-241.3)   | -2.59 (-2.7--2.49)  | -49.0       |

|                              |                     |                   |          |                     |                     |                     |       |
|------------------------------|---------------------|-------------------|----------|---------------------|---------------------|---------------------|-------|
| Central Latin America        | 6.7 (5.3-8.2)       | 399.7<br>490.8)   | (318-    | 5.6 (4.2-7.3)       | 219 (163.6-281.6)   | -2.01 (-2.16--1.87) | -16.4 |
| Central Sub-Saharan Africa   | 11.7 (9.3-14.5)     | 2144.8<br>2640.6) | (1723.4- | 20.8 (16-26.2)      | 1711.8<br>2123.4)   | -0.67 (-0.81--0.53) | 77.8  |
| East Asia                    | 349.9 (280.2-424.8) | 2758<br>3317.9)   | (2229.9- | 245.9 (182.6-314.9) | 1419.8<br>1798.7)   | -2.33 (-2.55--2.11) | -29.7 |
| Eastern Europe               | 5.2 (4.1-6.5)       | 238.6<br>295.2)   | (187.2-  | 3.1 (2.3-4.1)       | 141.2 (104.9-183.2) | -1.51 (-2.05--0.97) | -40.4 |
| Eastern Sub-Saharan Africa   | 40.9 (33.7-48.9)    | 2137.8<br>2536.2) | (1768.2- | 55.3 (44.9-67.8)    | 1503.3<br>1837.1)   | -1.25 (-1.4--1.11)  | 35.2  |
| High-income Asia Pacific     | 21 (17.4-25)        | 1179.2<br>1392.6) | (982.2-  | 15.9 (13-19.1)      | 770.3 (641.8-910.4) | -1.38 (-1.44--1.33) | -24.3 |
| High-income North America    | 5.1 (4-6.3)         | 180.3<br>220)     | (143.9-  | 4.1 (3.1-5.1)       | 101.7 (80-126.4)    | -1.92 (-2.03--1.82) | -19.6 |
| North Africa and Middle East | 53.2 (45.6-61.8)    | 1627<br>1874)     | (1397.9- | 59.3 (50.5-69.9)    | 966.1 (822-1133.1)  | -1.79 (-1.88--1.69) | 11.5  |
| Oceania                      | 1.8 (1.4-2.2)       | 2833.8<br>3432.2) | (2219.7- | 2.3 (1.8-2.8)       | 1849.6<br>2289.3)   | -1.26 (-1.38--1.14) | 27.8  |
| South Asia                   | 120.9 (98.5-145.6)  | 1109.8<br>1332.6) | (899.5-  | 148.5 (118.4-181)   | 801.1 (643.3-971.1) | -1.12 (-1.22--1.02) | 22.8  |
| Southeast Asia               | 97.1 (79.8-116.2)   | 2039.3<br>2421.7) | (1702.3- | 89.1 (71.6-109.5)   | 1253.4<br>1532.6)   | -1.63 (-1.77--1.5)  | -8.2  |
| Southern America             | 0.9 (0.8-1.1)       | 191.5<br>223.3)   | (162.3-  | 1.1 (0.9-1.3)       | 150.8 (126-179.8)   | -0.91 (-0.99--0.83) | 22.2  |
| Southern Sub-                | 8.4 (6.5-10.5)      | 1471.8            | (1134-   | 6.3 (4.8-8.1)       | 771.2 (588-985.3)   | -2.27 (-2.34--2.21) | -25.0 |



|                            |                  |                        |                    |                        |                     |       |  |  |  |
|----------------------------|------------------|------------------------|--------------------|------------------------|---------------------|-------|--|--|--|
| Saharan Africa             |                  |                        | 1836.6)            |                        |                     |       |  |  |  |
| Tropical Latin America     | 27.8 (22.7-33.4) | 1789.8 (1468.3-2145)   | 20.5 (15.4-26.1)   | 828.4 (627.8-1055.2)   | -2.85 (-3.06--2.64) | -26.3 |  |  |  |
| Western Europe             | 11.4 (9.3-13.7)  | 302.8 (251.4-357.2)    | 8.5 (6.5-10.4)     | 186.3 (148.2-227.6)    | -1.61 (-1.7--1.53)  | -25.4 |  |  |  |
| Western Sub-Saharan Africa | 65.1 (53.2-77.9) | 3501.9 (2901.8-4183.7) | 104.7 (85.8-126.7) | 2539.3 (2065.1-3059.8) | -1.11 (-1.21--1.01) | 60.8  |  |  |  |

**Table S2** Region-wise deaths of hepatitis B

| location             | Num_1990            | ASR_1990        | Num_2019            | ASR_2019       | EAPC_CI             | Num_change% |
|----------------------|---------------------|-----------------|---------------------|----------------|---------------------|-------------|
| Global               | 524.5 (468.3-585)   | 12.4 (11-13.8)  | 555.5 (487.1-630.1) | 6.7 (5.9-7.6)  | -2.55 (-2.74--2.35) | 5.9         |
| High SDI             | 36.3 (32.2-41.1)    | 3.7 (3.3-4.2)   | 40.5 (35.2-46.5)    | 2.4 (2.1-2.7)  | -1.81 (-2.01--1.62) | 11.6        |
| High-middle SDI      | 117.3 (102.8-133.6) | 10.7 (9.4-12.2) | 89.4 (76.7-102)     | 4.5 (3.9-5.2)  | -3.87 (-4.22--3.51) | -23.8       |
| Middle SDI           | 214.2 (190.6-240)   | 19 (17-21.4)    | 213.4 (185-242.6)   | 8.4 (7.3-9.6)  | -3.39 (-3.65--3.14) | -0.4        |
| Low-middle SDI       | 106.3 (92.2-122.2)  | 15.6 (13.5-18)  | 141.2 (120.9-163.1) | 9.7 (8.3-11.2) | -1.67 (-1.8--1.54)  | 32.8        |
| Low SDI              | 50.3 (41.2-61.6)    | 19 (15.5-23.6)  | 70.9 (59.1-84.3)    | 12 (10-14.4)   | -1.59 (-1.8--1.37)  | 41.0        |
| Andean Latin America | 1.3 (1.1-1.7)       | 6 (4.9-7.5)     | 1.7 (1.3-2.2)       | 3 (2.2-3.9)    | -2.73 (-2.9--2.55)  | 30.8        |
| Australasia          | 0.4 (0.3-0.5)       | 1.7 (1.4-2.1)   | 0.6 (0.5-0.8)       | 1.4 (1.2-1.7)  | -0.8 (-0.97--0.63)  | 50.0        |
| Caribbean            | 1.2 (1-1.5)         | 4.6 (3.6-5.7)   | 1.3 (0.9-1.7)       | 2.5 (1.8-3.3)  | -2.36 (-2.82--1.91) | 8.3         |

|                              |                     |                  |                     |                |                     |       |
|------------------------------|---------------------|------------------|---------------------|----------------|---------------------|-------|
| Central Asia                 | 5 (4.1-6)           | 9.4 (7.6-11.4)   | 7.6 (5.7-9.8)       | 9.3 (7.1-11.9) | -0.33 (-0.96-0.31)  | 52.0  |
| Central Europe               | 11.5 (9.4-13.6)     | 7.9 (6.5-9.3)    | 7.7 (5.9-9.9)       | 4.1 (3.2-5.2)  | -3.04 (-3.36--2.72) | -33.0 |
| Central Latin America        | 2.4 (2.1-2.8)       | 2.5 (2.2-2.9)    | 3.5 (2.9-4.3)       | 1.5 (1.2-1.8)  | -2.55 (-2.77--2.32) | 45.8  |
| Central Sub-Saharan Africa   | 5.3 (3.8-7.2)       | 20.7 (14.9-27.6) | 7 (4.9-9.7)         | 11 (7.8-15.3)  | -1.94 (-2.21--1.66) | 32.1  |
| East Asia                    | 235.8 (200.7-277.7) | 24.5 (21-28.7)   | 169.5 (140-202.5)   | 8.2 (6.8-9.7)  | -4.84 (-5.28--4.41) | -28.1 |
| Eastern Europe               | 7.3 (6.4-8.4)       | 2.7 (2.4-3.1)    | 11.9 (9.6-14.2)     | 4 (3.3-4.8)    | 1.22 (0.12-2.33)    | 63.0  |
| Eastern Sub-Saharan Africa   | 13.3 (9.8-17.8)     | 15.9 (12.2-20.8) | 18.8 (15.1-23.3)    | 10 (8-12.5)    | -1.59 (-1.87--1.31) | 41.4  |
| High-income Asia Pacific     | 17.6 (16-19.2)      | 8.6 (7.9-9.4)    | 19.8 (17.1-22.4)    | 5.2 (4.5-5.8)  | -1.87 (-2.12--1.62) | 12.5  |
| High-income North America    | 2.7 (2.4-3)         | 0.8 (0.7-0.9)    | 4.9 (4.3-5.7)       | 0.9 (0.7-1)    | 0.49 (0.39-0.58)    | 81.5  |
| North Africa and Middle East | 34.3 (26.8-43.8)    | 21 (16.1-26.9)   | 36.6 (27.1-48.2)    | 8.8 (6.4-11.6) | -3.29 (-3.45--3.13) | 6.7   |
| Oceania                      | 0.4 (0.3-0.5)       | 9.8 (7.8-12.3)   | 0.6 (0.4-0.7)       | 6.5 (5-8.3)    | -1.42 (-1.5--1.34)  | 50.0  |
| South Asia                   | 83.7 (70-102.2)     | 12.6 (10.8-14.9) | 137.4 (114.5-165.1) | 9.1 (7.7-10.9) | -0.88 (-1.07--0.68) | 64.2  |
| Southeast Asia               | 49.3 (42.6-57.2)    | 17 (14.7-19.9)   | 63.7 (53.4-76.3)    | 10 (8.4-11.9)  | -2.08 (-2.22--1.94) | 29.2  |
| Southern Latin America       | 1.8 (1.3-2.4)       | 3.9 (2.8-5.1)    | 1.7 (1.2-2.2)       | 2.1 (1.5-2.7)  | -2.16 (-2.43--1.88) | -5.6  |
| Southern Sub-Saharan Africa  | 3.2 (2.4-4.1)       | 10 (7.5-13.1)    | 3.5 (3-4.1)         | 5.6 (4.8-6.5)  | -2.32 (-2.76--1.89) | 9.4   |
| Tropical Latin America       | 5.9 (5.3-6.5)       | 5.6 (5.1-6.2)    | 5.6 (5-6.3)         | 2.2 (2-2.5)    | -3.64 (-4.02--3.25) | -5.1  |

|                            |                  |                |                  |                |                     |       |
|----------------------------|------------------|----------------|------------------|----------------|---------------------|-------|
| Western Europe             | 11.9 (9.7-14.6)  | 2.3 (1.8-2.7)  | 10.1 (8.2-12.2)  | 1.3 (1-1.5)    | -2.33 (-2.47--2.19) | -15.1 |
| Western Sub-Saharan Africa | 30.2 (22.6-39.9) | 31.8 (24-41.7) | 42.2 (32.8-53.9) | 20 (15.8-25.1) | -1.54 (-1.73--1.36) | 39.7  |

**Table S3** Region-wise DALYs of hepatitis B

| location             | Num_1990            | ASR_1990            | Num_2019          | ASR_2019            | EAPC_CI             | Num_change% |
|----------------------|---------------------|---------------------|-------------------|---------------------|---------------------|-------------|
| Global               | 186.3 (166.7-209.2) | 410 (367.5-457.5)   | 182 (159.1-205.7) | 219.9 (192.9-247.8) | -2.58 (-2.76--2.39) | -2.3        |
| High SDI             | 11.6 (10.3-12.9)    | 122.2 (108.4-136.7) | 10.5 (9.2-12)     | 69.5 (60.9-79.4)    | -2.23 (-2.44--2.03) | -9.5        |
| High-middle SDI      | 39.5 (34.7-45)      | 349.4 (307.1-398.3) | 28 (24.2-32)      | 147.1 (127.6-167.4) | -3.9 (-4.26--3.55)  | -29.1       |
| Middle SDI           | 76.3 (67.6-86)      | 591 (526.2-661.9)   | 67.3 (58.3-76.3)  | 252.7 (220.3-286.3) | -3.52 (-3.79--3.26) | -11.8       |
| Low-middle SDI       | 40.4 (34.4-48.5)    | 502.6 (435.6-577)   | 50 (42.4-58.1)    | 314.1 (267.1-362.5) | -1.6 (-1.74--1.46)  | 23.8        |
| Low SDI              | 18.5 (15-23)        | 573 (473-697.8)     | 26 (21.6-31.1)    | 365.9 (304.2-436.8) | -1.54 (-1.76--1.32) | 40.5        |
| Andean Latin America | 0.4 (0.4-0.6)       | 177.4 (144.6-224.1) | 0.5 (0.4-0.6)     | 81.1 (59.6-108)     | -3.07 (-3.25--2.9)  | 25.0        |
| Australasia          | 0.1 (0.1-0.1)       | 54.7 (44.1-66.5)    | 0.2 (0.1-0.2)     | 43.9 (35.5-54)      | -0.84 (-1--0.68)    | 100.0       |
| Caribbean            | 0.4 (0.3-0.5)       | 141 (112.4-178.5)   | 0.4 (0.3-0.5)     | 77.4 (56.4-105.7)   | -2.32 (-2.78--1.86) | 0.0         |
| Central Asia         | 2 (1.7-2.4)         | 333.8 (276.3-394.7) | 2.7 (2-3.5)       | 297.3 (228.4-381.5) | -0.68 (-1.29--0.07) | 35.0        |

|                              |                     |                  |                             |                  |                                |       |
|------------------------------|---------------------|------------------|-----------------------------|------------------|--------------------------------|-------|
| Central Europe               | 3.6 (3-4.3)         | 252<br>295.7)    | (209.2-<br>2.2 (1.7-2.9)    | 130.7<br>166.2)  | (101.3-<br>-3.11 (-3.46--2.77) | -38.9 |
| Central Latin America        | 0.9 (0.8-1)         | 82.2 (72.6-93.5) | 1.1 (0.9-1.4)               | 45.2 (36.5-55.2) | -2.8 (-3.04--2.55)             | 22.2  |
| Central Sub-Saharan Africa   | 1.9 (1.4-2.6)       | 619.2<br>835.5)  | (450-<br>2.6 (1.8-3.6)      | 341.8<br>470.7)  | (237.8-<br>-1.83 (-2.1--1.57)  | 36.8  |
| East Asia                    | 82.8 (70.6-96.7)    | 788.1<br>919.5)  | (673.6-<br>52.1 (42.6-62.3) | 250.4<br>299)    | (206.1-<br>-5.06 (-5.54--4.59) | -37.1 |
| Eastern Europe               | 2.4 (2.1-2.8)       | 92.8<br>105.8)   | (81.3-<br>4.3 (3.4-5.1)     | 153.6<br>187.1)  | (124.3-<br>1.58 (0.38-2.8)     | 79.2  |
| Eastern Sub-Saharan Africa   | 4.7 (3.4-6.4)       | 475.5<br>631.2)  | (353.5-<br>6.8 (5.4-8.5)    | 295<br>367.3)    | (237.5-<br>-1.67 (-1.95--1.4)  | 44.7  |
| High-income Asia Pacific     | 5.7 (5.2-6.3)       | 278.8<br>305)    | (253.4-<br>4.8 (4.2-5.4)    | 150.6<br>168.9)  | (133-<br>-2.24 (-2.52--1.96)   | -15.8 |
| High-income America          | North 0.8 (0.7-0.9) | 26.5 (23.5-29.8) | 1.3 (1.2-1.6)               | 25.6 (22.2-29.7) | 0.19 (0.1-0.28)                | 62.5  |
| North Africa and Middle East | 10.3 (8-13.5)       | 506.7 (400-649)  | 10.3 (7.7-13.6)             | 212.6<br>278.9)  | (158.5-<br>-3.28 (-3.42--3.13) | 0.0   |
| Oceania                      | 0.1 (0.1-0.2)       | 333.4<br>423.7)  | (262.8-<br>0.2 (0.2-0.3)    | 215.4<br>279.5)  | (164.3-<br>-1.49 (-1.55--1.43) | 100.0 |
| South Asia                   | 33.9 (26.9-45.3)    | 413.5<br>505.1)  | (345.4-<br>50.4 (41.9-60.6) | 304<br>365.4)    | (252.7-<br>-0.76 (-0.98--0.54) | 48.7  |
| Southeast Asia               | 18.1 (15.6-21.1)    | 541.7<br>624.9)  | (469.6-<br>20.8 (17.3-25)   | 299.4<br>356.4)  | (251-<br>-2.31 (-2.46--2.16)   | 14.9  |
| Southern Latin America       | 0.6 (0.4-0.7)       | 120.3<br>159.6)  | (88.6-<br>0.5 (0.3-0.6)     | 58.8 (44-77.7)   | -2.42 (-2.67--2.17)            | -16.7 |

|                        |             |               |                      |                  |                     |                     |       |
|------------------------|-------------|---------------|----------------------|------------------|---------------------|---------------------|-------|
| Southern Africa        | Sub-Saharan | 1.2 (0.9-1.6) | 330.4 (249.8-431.5)  | 1.3 (1.1-1.5)    | 181.4 (153.6-214.8) | -2.37 (-2.81--1.93) | 8.3   |
| Tropical Latin America |             | 2.2 (2-2.5)   | 191.2 (172.7-212.1)  | 1.8 (1.6-2.1)    | 72.8 (65-82.1)      | -3.84 (-4.24--3.44) | -18.2 |
| Western Europe         |             | 3.4 (2.8-4.1) | 69.3 (56.6-85.1)     | 2.5 (2.1-3)      | 36.6 (30.4-44.1)    | -2.56 (-2.71--2.41) | -26.5 |
| Western Africa         | Sub-Saharan | 10.6 (7.8-14) | 910.9 (682.4-1191.3) | 15.1 (11.5-19.5) | 572.9 (443.5-731.9) | -1.56 (-1.74--1.39) | 42.5  |

**Table S4** Country-wise ASIR, ASMR and ASDR of hepatitis B in 2019

| location       | ASIR   | upper  | lower  | ASMR | upper | lower | ASDR  | upper | lower |
|----------------|--------|--------|--------|------|-------|-------|-------|-------|-------|
| Afghanistan    | 1706.3 | 2294.4 | 1253.2 | 15.2 | 21.6  | 10.3  | 436.9 | 637.6 | 291   |
| Albania        | 173.1  | 212.7  | 141.2  | 3    | 4.2   | 2.1   | 83.6  | 117.3 | 57.9  |
| Algeria        | 563.7  | 749.4  | 405    | 3.6  | 4.9   | 2.6   | 87.6  | 120.2 | 63.1  |
| American Samoa | 1769.9 | 2231.8 | 1328.1 | 9.5  | 11.8  | 7.7   | 294.9 | 380.5 | 233.1 |
| Andorra        | 152.5  | 208.7  | 105.4  | 2.1  | 2.8   | 1.4   | 59.6  | 82.6  | 41.4  |
| Angola         | 3044.7 | 3860.3 | 2307.6 | 13.3 | 18    | 9.4   | 395.2 | 538.1 | 280.5 |
| Argentina      | 137.5  | 164.2  | 112.5  | 1.9  | 2.6   | 1.4   | 54.8  | 72.7  | 41    |
| Armenia        | 517.4  | 666.2  | 388.7  | 5.8  | 7.7   | 4.3   | 149.3 | 197.9 | 112.3 |
| Australia      | 614.1  | 743.6  | 495.1  | 1.4  | 1.8   | 1.1   | 45.1  | 56.4  | 35.7  |
| Austria        | 146.3  | 199.5  | 100.8  | 1.1  | 1.4   | 0.8   | 31.1  | 41    | 23.2  |
| Azerbaijan     | 927    | 1140.5 | 716.2  | 8    | 11.2  | 5.7   | 203.9 | 272.2 | 150.3 |
| Bahamas        | 151.8  | 191.7  | 117.8  | 1.9  | 2.6   | 1.4   | 62.1  | 83.7  | 44.4  |
| Bahrain        | 633.5  | 813.6  | 489.8  | 4.6  | 6.1   | 3.3   | 101.7 | 137.1 | 75.8  |
| Bangladesh     | 879.6  | 1045.7 | 730.9  | 6.6  | 9.2   | 4.7   | 192.1 | 269.2 | 134.5 |
| Barbados       | 106.1  | 134.8  | 79.8   | 1.3  | 1.7   | 1     | 38.1  | 50    | 28.4  |

|                          |        |        |        |      |      |      |       |        |       |
|--------------------------|--------|--------|--------|------|------|------|-------|--------|-------|
| Barbuda                  | 124.3  | 156.1  | 96.3   | 1.5  | 1.9  | 1.1  | 42.2  | 54.4   | 32.5  |
| Barbuda                  | 124.3  | 156.1  | 96.3   | 1.5  | 1.9  | 1.1  | 42.2  | 54.4   | 32.5  |
| Belarus                  | 94.7   | 129.6  | 65     | 2.5  | 3.6  | 1.7  | 92.1  | 130.4  | 61.6  |
| Belgium                  | 136.2  | 172.3  | 103.1  | 0.9  | 1.2  | 0.7  | 26.4  | 33.7   | 20.7  |
| Belize                   | 176.4  | 220.5  | 136.8  | 2.4  | 3.2  | 1.8  | 75.3  | 99.1   | 56.7  |
| Benin                    | 2070.6 | 2808.7 | 1468   | 17.8 | 23.6 | 12.8 | 532.8 | 719.8  | 372.2 |
| Bermuda                  | 167.6  | 203    | 136    | 1.2  | 1.6  | 0.9  | 34.9  | 46     | 25.8  |
| Bhutan                   | 875.3  | 1034.2 | 726.9  | 8.8  | 15.8 | 5.5  | 265.1 | 476.8  | 166.5 |
| Bolivia                  | 281    | 340.6  | 235.7  | 4.5  | 6.1  | 3.2  | 115.3 | 158.7  | 81.2  |
| Bosnia and Herzegovina   | 191.9  | 230.4  | 160    | 3.7  | 4.9  | 2.6  | 103.2 | 139.6  | 74.3  |
| Botswana                 | 789.3  | 1106.9 | 507.6  | 5.4  | 8    | 3.6  | 175.5 | 263.9  | 110.9 |
| Brazil                   | 826    | 1050.5 | 625.3  | 2.2  | 2.5  | 2    | 73.1  | 82.2   | 65.3  |
| Brunei                   | 445.3  | 604.6  | 315.1  | 8.6  | 10.5 | 7    | 258.2 | 316.6  | 209.6 |
| Bulgaria                 | 419.4  | 521.9  | 334.2  | 5.4  | 7.4  | 3.8  | 180.7 | 252    | 127.7 |
| Burkina Faso             | 3430.3 | 4419.2 | 2510.4 | 14.1 | 20.4 | 8.3  | 392.9 | 568.6  | 230.7 |
| Burundi                  | 1009.5 | 1209.2 | 825.4  | 6.6  | 11.4 | 3.7  | 202.7 | 359.2  | 115.6 |
| Cambodia                 | 1815.3 | 2412.7 | 1267.8 | 19.1 | 25.1 | 14   | 593.6 | 803.6  | 432.4 |
| Cameroon                 | 1569.2 | 1875   | 1310.7 | 14.7 | 21.3 | 9.8  | 447.6 | 639.5  | 302.4 |
| Canada                   | 484.2  | 590.9  | 386.5  | 0.7  | 0.9  | 0.5  | 20.7  | 26.8   | 15.9  |
| Cape Verde               | 1509.4 | 2027.3 | 1052.8 | 16.1 | 19.9 | 12.7 | 471.2 | 596.9  | 367.8 |
| Central African Republic | 3338.2 | 3935.4 | 2815.2 | 13.7 | 21.4 | 8.4  | 432.5 | 704.3  | 251.5 |
| Chad                     | 2813.7 | 3710.6 | 2044.6 | 27   | 35.7 | 20   | 803.4 | 1069.7 | 587.7 |
| Chile                    | 195.2  | 235    | 165    | 2.5  | 3.3  | 1.9  | 72.2  | 95.7   | 53.7  |
| China                    | 1397.3 | 1775.2 | 1031.3 | 8.1  | 9.7  | 6.7  | 247.7 | 298.2  | 202.1 |
| Colombia                 | 507.8  | 722.9  | 337.4  | 0.7  | 0.9  | 0.5  | 19.4  | 27     | 13.9  |

|                                  |        |        |        |      |      |      |        |        |       |
|----------------------------------|--------|--------|--------|------|------|------|--------|--------|-------|
| Comoros                          | 1202.5 | 1603.4 | 791.6  | 6.7  | 9.9  | 4.2  | 201.8  | 301.4  | 124.3 |
| Cook Islands                     | 799.8  | 1014   | 592.3  | 7.7  | 9.9  | 5.8  | 234.8  | 304.4  | 173.3 |
| Costa Rica                       | 192    | 255.3  | 134.2  | 1.3  | 1.8  | 0.9  | 39.5   | 54.1   | 28    |
| Croatia                          | 253.1  | 312    | 202    | 3.4  | 4.6  | 2.4  | 100.5  | 138.8  | 70.3  |
| Cuba                             | 70.3   | 94.4   | 49.9   | 1.3  | 1.8  | 1    | 38.4   | 53.6   | 27.7  |
| Cyprus                           | 183.9  | 218.8  | 152.7  | 0.9  | 1.1  | 0.7  | 22.3   | 28.8   | 17.3  |
| Czech Republic                   | 181.3  | 230.7  | 139.1  | 2.8  | 3.8  | 2    | 89.5   | 122.2  | 64.2  |
| Democratic Republic of the Congo | 1200.3 | 1537.3 | 858.3  | 10.3 | 14.9 | 6.9  | 325    | 464    | 216.6 |
| Denmark                          | 240.7  | 307.9  | 187.1  | 1.6  | 2.1  | 1.2  | 47.9   | 62.4   | 36    |
| Djibouti                         | 1365.3 | 1808.5 | 964.6  | 7.7  | 12.3 | 4.7  | 229.5  | 369    | 139.6 |
| Dominica                         | 165.8  | 211.7  | 127.4  | 1.7  | 2.2  | 1.2  | 50.3   | 66.7   | 36.7  |
| Dominican Republic               | 210.4  | 253.5  | 164.6  | 3.8  | 5.4  | 2.5  | 111.4  | 161.7  | 72    |
| Ecuador                          | 252.3  | 293.3  | 215.2  | 3.1  | 4.2  | 2.2  | 78.6   | 109.2  | 55.9  |
| Egypt                            | 2191.1 | 2529.9 | 1925.1 | 36.6 | 53.5 | 22.6 | 754.5  | 1114.4 | 463.6 |
| El Salvador                      | 173.9  | 241.2  | 116.3  | 1.1  | 1.6  | 0.8  | 35.8   | 53.1   | 24.1  |
| Equatorial Guinea                | 553.8  | 633    | 479.6  | 8.3  | 12.9 | 5.2  | 234.9  | 374.7  | 140.6 |
| Eritrea                          | 1390.2 | 1846.3 | 1006.6 | 9.2  | 13.5 | 5.9  | 287.5  | 429.7  | 183.7 |
| Estonia                          | 116.3  | 159.4  | 79     | 2.4  | 3.5  | 1.7  | 82.2   | 120.1  | 56.7  |
| Ethiopia                         | 977.8  | 1206.9 | 785.3  | 13.9 | 17.5 | 11.1 | 384.4  | 487    | 303   |
| Fiji                             | 967.1  | 1278.8 | 677.9  | 6.4  | 8.3  | 4.7  | 195.4  | 258.8  | 145.5 |
| Finland                          | 242.4  | 311.4  | 190.1  | 2    | 2.6  | 1.5  | 64.3   | 84.7   | 47.4  |
| France                           | 392.9  | 472.5  | 313.2  | 1.5  | 1.9  | 1.1  | 44.3   | 56.3   | 33.8  |
| Gabon                            | 1529   | 1908.4 | 1183.4 | 9.6  | 14.2 | 6.2  | 285.1  | 423.3  | 184.8 |
| Gambia                           | 1878.8 | 2150.5 | 1652.8 | 35.5 | 47.4 | 25.7 | 1072.7 | 1444.3 | 771.8 |

|               |        |        |        |      |      |      |        |        |       |
|---------------|--------|--------|--------|------|------|------|--------|--------|-------|
| Georgia       | 417.6  | 477.3  | 359.1  | 7.1  | 9.5  | 5.2  | 243.1  | 332.4  | 177.2 |
| Germany       | 101.3  | 126.8  | 80.1   | 1.2  | 1.6  | 0.9  | 35.2   | 46.5   | 26.6  |
| Ghana         | 2825.3 | 3628.1 | 2105.4 | 17.4 | 23   | 12.8 | 508.7  | 673.1  | 370   |
| Greece        | 451.6  | 557.4  | 357.2  | 1.7  | 2.1  | 1.4  | 45.1   | 53.6   | 37.5  |
| Greenland     | 386.6  | 508.8  | 291.8  | 1.5  | 2.1  | 1.1  | 48.9   | 68.6   | 34.3  |
| Grenada       | 168    | 207.3  | 130.9  | 1.8  | 2.4  | 1.4  | 55.5   | 71.8   | 43.1  |
| Grenadines    | 144    | 179.6  | 110.2  | 1.8  | 2.3  | 1.3  | 55     | 72.2   | 42.1  |
| Grenadines    | 144    | 179.6  | 110.2  | 1.8  | 2.3  | 1.3  | 55     | 72.2   | 42.1  |
| Guam          | 1777.1 | 2139.3 | 1455.3 | 10.7 | 13.3 | 8.7  | 343.6  | 429.4  | 276   |
| Guatemala     | 425.6  | 535    | 316.4  | 2.3  | 3.2  | 1.6  | 76.5   | 108.6  | 53.5  |
| Guinea        | 3278.4 | 4326.3 | 2445.8 | 37   | 49.4 | 27.4 | 1092.1 | 1454.1 | 802.2 |
| Guinea-Bissau | 2944   | 3818.8 | 2153   | 27.7 | 37.9 | 20   | 845.1  | 1157.9 | 604.3 |
| Guyana        | 243.5  | 298.6  | 193.6  | 3.5  | 5    | 2.4  | 116.6  | 167.7  | 78.8  |
| Haiti         | 414.1  | 536.9  | 293.8  | 4.7  | 7    | 2.7  | 145    | 218    | 82.3  |
| Honduras      | 383.3  | 502.8  | 279.1  | 4    | 5.9  | 2.4  | 108.9  | 164.4  | 66.1  |
| Hungary       | 364.5  | 416.2  | 320.3  | 6.8  | 8.9  | 5    | 214.5  | 282.1  | 158.6 |
| Iceland       | 165    | 212.4  | 122.7  | 0.9  | 1.2  | 0.7  | 26.7   | 34.2   | 20.7  |
| India         | 792.7  | 968    | 623.9  | 9.1  | 11   | 7.4  | 309.2  | 378.5  | 248   |
| Indonesia     | 1091.4 | 1329.3 | 875.2  | 10.5 | 12.6 | 8.6  | 287.2  | 352.3  | 235.8 |
| Iran          | 356.1  | 449.1  | 268.9  | 3.4  | 3.8  | 3    | 86.5   | 96     | 78    |
| Iraq          | 467.4  | 619    | 322.1  | 4.5  | 5.9  | 3.3  | 123.1  | 165    | 89.4  |
| Ireland       | 138.3  | 183.9  | 96.3   | 0.9  | 1.1  | 0.7  | 25.3   | 32     | 19.6  |
| Israel        | 122.5  | 166.9  | 82.4   | 0.8  | 1.1  | 0.6  | 21.9   | 27.6   | 17.2  |
| Italy         | 90.2   | 121    | 62.8   | 1.3  | 1.5  | 1.2  | 36.2   | 40.3   | 32.6  |
| Ivory Coast   | 2586.2 | 3047.5 | 2173.4 | 17.2 | 24.1 | 11.8 | 509.6  | 707.3  | 349.1 |



|                  |        |        |        |      |      |      |       |       |       |
|------------------|--------|--------|--------|------|------|------|-------|-------|-------|
| Jamaica          | 77.7   | 98.4   | 58.6   | 1.1  | 1.5  | 0.8  | 33    | 44.8  | 23.9  |
| Japan            | 812.7  | 988    | 645.7  | 2.4  | 2.7  | 2.1  | 63.5  | 71    | 56.9  |
| Jordan           | 818.2  | 1027.2 | 638    | 2.6  | 3.5  | 1.9  | 64.2  | 83.3  | 47.8  |
| Kazakhstan       | 488.4  | 651.4  | 354.1  | 7.3  | 9.7  | 5.4  | 231.8 | 315.3 | 170   |
| Kenya            | 1166   | 1439.8 | 936.1  | 12.2 | 17.7 | 8.9  | 358.2 | 511.1 | 257.6 |
| Kiribati         | 2089   | 2743.2 | 1517.7 | 19.3 | 28.1 | 12.6 | 656.1 | 973.9 | 408.7 |
| Kuwait           | 180.4  | 257.2  | 118.5  | 2    | 2.7  | 1.5  | 49.4  | 65    | 36.7  |
| Kyrgyzstan       | 630    | 829.5  | 454.7  | 7.5  | 10.1 | 5.5  | 259.8 | 354.9 | 186.4 |
| Laos             | 1939.1 | 2607.5 | 1398.5 | 10.5 | 14.5 | 7.4  | 323.9 | 447.4 | 226.6 |
| Latvia           | 73.6   | 108.4  | 49     | 2.2  | 3.1  | 1.6  | 78.6  | 111.6 | 54.8  |
| Lebanon          | 833.2  | 1048.5 | 644.2  | 6.1  | 9.2  | 4.3  | 137.3 | 196.1 | 98.2  |
| Lesotho          | 1404.8 | 1996   | 897.7  | 11.8 | 17.6 | 6.6  | 377   | 583.9 | 202.8 |
| Liberia          | 2517.6 | 3320.9 | 1780.7 | 21.9 | 30.5 | 15.7 | 628.4 | 889.2 | 441   |
| Libya            | 536    | 671.7  | 418.1  | 4.8  | 6.5  | 3.4  | 128.4 | 176   | 93.8  |
| Lithuania        | 108.7  | 147.2  | 72.8   | 3.1  | 4.4  | 2.2  | 113.5 | 163.7 | 79.3  |
| Luxembourg       | 163    | 213.6  | 117.2  | 1    | 1.3  | 0.8  | 29.8  | 38.6  | 22.1  |
| Madagascar       | 1365.4 | 1771   | 953.7  | 7.2  | 10.4 | 4.9  | 223.6 | 326.9 | 151.4 |
| Malawi           | 1970.6 | 2737.4 | 1268.5 | 8.4  | 11.6 | 5.8  | 256.7 | 357.3 | 173.6 |
| Malaysia         | 548.4  | 637.3  | 465.9  | 11.1 | 14.3 | 8.6  | 298.7 | 385.5 | 229.4 |
| Maldives         | 579.5  | 801.9  | 391.4  | 4.4  | 5.6  | 3.4  | 116.9 | 148   | 91.3  |
| Mali             | 1557.4 | 1963   | 1157.8 | 22.3 | 29.5 | 16.3 | 675.2 | 911.4 | 482.4 |
| Malta            | 101.3  | 135.9  | 72.1   | 0.7  | 0.9  | 0.5  | 20.1  | 26.1  | 15.5  |
| Marshall Islands | 1486   | 1893.7 | 1177.1 | 13.6 | 19.3 | 9    | 435.5 | 627.8 | 282   |
| Mauritania       | 4172.7 | 4788.9 | 3622.3 | 15.3 | 21   | 10.5 | 430.2 | 627   | 278.9 |
| Mauritius        | 640.6  | 825.5  | 481.3  | 4.4  | 5.9  | 3.3  | 145.3 | 197.2 | 103.3 |

|                          |        |        |        |      |      |      |        |        |       |
|--------------------------|--------|--------|--------|------|------|------|--------|--------|-------|
| Mexico                   | 76.8   | 89.5   | 65.6   | 1.7  | 2.1  | 1.4  | 54.4   | 67     | 43.7  |
| Micronesia               | 1248.5 | 1550.7 | 983.7  | 13.6 | 20.8 | 8.2  | 433    | 694.2  | 246   |
| Moldova                  | 337.4  | 413.3  | 272.1  | 6.8  | 9.3  | 4.8  | 217.4  | 302.7  | 155   |
| Monaco                   | 106.7  | 148.2  | 69.8   | 1.6  | 2.2  | 1.1  | 47.8   | 65.6   | 33.1  |
| Mongolia                 | 1698.1 | 2008.5 | 1453.8 | 39.7 | 54.2 | 28.2 | 1089.5 | 1501.5 | 772.7 |
| Montenegro               | 157.5  | 195.8  | 121.9  | 2.3  | 3    | 1.7  | 70.7   | 93.1   | 52.3  |
| Morocco                  | 420.4  | 500.5  | 346.7  | 4.4  | 5.8  | 3.2  | 106.1  | 142.5  | 75.2  |
| Mozambique               | 2032.5 | 2818.3 | 1365.5 | 5.8  | 8.5  | 3.7  | 174.9  | 256.7  | 110   |
| Myanmar                  | 623.1  | 791.8  | 467    | 12.5 | 17.2 | 9    | 459.5  | 649.7  | 318.6 |
| Namibia                  | 1433.1 | 1648.9 | 1251.3 | 5.3  | 7.6  | 3.6  | 164.7  | 240.2  | 108.4 |
| Nauru                    | 1725.3 | 2197.3 | 1327.5 | 12.8 | 19.2 | 8.1  | 411.5  | 630.4  | 248.5 |
| Nepal                    | 508.7  | 590.3  | 429.6  | 9.1  | 13.5 | 6    | 263.6  | 388    | 172.2 |
| Netherlands              | 192.6  | 252.4  | 137    | 0.9  | 1.1  | 0.7  | 23.8   | 29.6   | 18.9  |
| Nevis                    | 182.5  | 228.1  | 147.7  | 2.2  | 3    | 1.6  | 64.3   | 90.1   | 43.5  |
| Nevis                    | 182.5  | 228.1  | 147.7  | 2.2  | 3    | 1.6  | 64.3   | 90.1   | 43.5  |
| New Zealand              | 171.5  | 220.7  | 123    | 1.3  | 1.4  | 1.1  | 37.6   | 42.1   | 33.3  |
| Nicaragua                | 272.7  | 325.7  | 227.1  | 1.6  | 2.2  | 1.2  | 46.6   | 63.8   | 33.2  |
| Niger                    | 3456.9 | 4113.6 | 2894.8 | 18.8 | 27.4 | 12.1 | 557.7  | 830.4  | 352   |
| Nigeria                  | 2568.7 | 3181.7 | 2038.6 | 21.1 | 30.4 | 14.7 | 588.2  | 863.2  | 393.1 |
| Niue                     | 880    | 1136.6 | 661.3  | 8.8  | 11.4 | 6.4  | 268.7  | 365.1  | 190.4 |
| North Korea              | 2165.4 | 2891.7 | 1525.3 | 11.4 | 14.9 | 8.3  | 364.5  | 490.4  | 260.5 |
| North Macedonia          | 242    | 293.9  | 194.8  | 3.9  | 5.3  | 2.8  | 111.2  | 151    | 79.2  |
| Northern Mariana Islands | 2436.5 | 2947.1 | 1982   | 15   | 18.3 | 12.1 | 442.9  | 558.6  | 348.6 |
| Norway                   | 92.4   | 126    | 61.5   | 0.6  | 0.7  | 0.5  | 17.3   | 19.7   | 15    |
| Oman                     | 898.4  | 1153   | 671.8  | 4.4  | 5.8  | 3.3  | 110.1  | 149.3  | 79.6  |

|                       |        |        |        |      |      |      |       |       |       |
|-----------------------|--------|--------|--------|------|------|------|-------|-------|-------|
| Pakistan              | 886.6  | 1073.6 | 725.2  | 12.8 | 17.5 | 9.3  | 394   | 522.2 | 290.3 |
| Palau                 | 993.3  | 1264.1 | 716.2  | 11.8 | 16.3 | 8.4  | 390.6 | 544.5 | 267.8 |
| Palestine             | 475.9  | 661.2  | 343.6  | 5.2  | 6.7  | 4    | 125.6 | 159.6 | 97.3  |
| Panama                | 130.7  | 172.9  | 89.9   | 0.8  | 1.1  | 0.6  | 24.1  | 33.7  | 17.2  |
| Papua New Guinea      | 1982.5 | 2461.9 | 1506.8 | 4.6  | 6.5  | 3.3  | 161.1 | 225.2 | 111.6 |
| Paraguay              | 887.6  | 1182.8 | 572.9  | 2    | 2.9  | 1.4  | 62.7  | 89.6  | 42.5  |
| Peru                  | 252.8  | 293.7  | 218.2  | 2.6  | 3.7  | 1.8  | 72.8  | 104.4 | 50    |
| Philippines           | 1702.4 | 2251.2 | 1215.4 | 7    | 8.7  | 5.6  | 222.4 | 280.8 | 174.8 |
| Poland                | 100.7  | 127.2  | 77.9   | 3    | 3.7  | 2.3  | 100   | 126.7 | 77.8  |
| Portugal              | 157.6  | 217.9  | 106.3  | 1.3  | 1.7  | 1    | 40.7  | 52.6  | 31.4  |
| Puerto Rico           | 94.5   | 118.4  | 73.9   | 1.7  | 2.4  | 1.2  | 51.1  | 72.2  | 35.4  |
| Qatar                 | 624    | 758.1  | 518.2  | 9.8  | 14.1 | 6.7  | 189   | 269.4 | 130.1 |
| Republic of Congo     | 1595.4 | 2158.2 | 1109.4 | 10.3 | 14.4 | 6.8  | 305   | 433.8 | 194.6 |
| Romania               | 247.5  | 306.6  | 197.3  | 6.2  | 8.6  | 4.3  | 192.8 | 274.3 | 134.1 |
| Russia                | 120.9  | 159.2  | 88.3   | 3.4  | 4.2  | 2.8  | 129   | 159   | 101.7 |
| Rwanda                | 864.4  | 1209   | 540.6  | 4.8  | 6.8  | 3.3  | 151.5 | 213   | 103.9 |
| Saint Lucia           | 168.4  | 210    | 134.8  | 1.6  | 2.1  | 1.2  | 47.1  | 63.4  | 35.1  |
| Samoa                 | 1754.1 | 2151.1 | 1383   | 10.2 | 13.4 | 7.7  | 319.1 | 432.4 | 229.5 |
| San Marino            | 164.1  | 207.7  | 122.5  | 1.3  | 2    | 0.8  | 35.8  | 56.2  | 21.5  |
| Sao Tome and Principe | 2073.3 | 2727.9 | 1504.8 | 20.1 | 27.6 | 13.8 | 572.9 | 792.1 | 395.2 |
| Saudi Arabia          | 852.6  | 1084.6 | 640.3  | 4.9  | 6.7  | 3.5  | 110.3 | 146.1 | 80.7  |
| Senegal               | 1909.1 | 2523.8 | 1379.1 | 14.6 | 20.4 | 9.9  | 426.5 | 606.7 | 284.5 |
| Serbia                | 178.5  | 228.3  | 135.7  | 2.8  | 3.8  | 2    | 82.7  | 112.8 | 58.8  |
| Seychelles            | 858.9  | 1105.7 | 643.6  | 9.6  | 12.1 | 7.5  | 305.5 | 387.5 | 232.1 |
| Sierra Leone          | 2042   | 2886.9 | 1450.6 | 16.1 | 22.1 | 11.4 | 494   | 679.6 | 347.3 |

|                 |        |        |        |      |      |      |       |       |       |
|-----------------|--------|--------|--------|------|------|------|-------|-------|-------|
| Singapore       | 664.9  | 814.9  | 533.3  | 6.5  | 7.6  | 5.4  | 153.4 | 176   | 131.6 |
| Slovakia        | 202.2  | 256.2  | 150.3  | 4.3  | 6    | 2.9  | 140.6 | 202.4 | 96.8  |
| Slovenia        | 235.8  | 294    | 186.4  | 3.9  | 5.6  | 2.7  | 114.4 | 163.3 | 78.7  |
| Solomon Islands | 1536.1 | 2170.2 | 1031.8 | 13.9 | 18.2 | 10.3 | 503.7 | 672.4 | 370.9 |
| Somalia         | 3844.6 | 4567.3 | 3180.3 | 19.5 | 31.3 | 12.5 | 598   | 980.9 | 379.4 |
| South Africa    | 368.2  | 515.3  | 257.8  | 4.5  | 5.1  | 4    | 146   | 166.2 | 127.1 |
| South Korea     | 729.6  | 864.4  | 624.4  | 13.1 | 15.2 | 11.1 | 359.1 | 409.7 | 307.7 |
| South Sudan     | 1712.4 | 2231.2 | 1233.4 | 12.6 | 19.4 | 7.9  | 359.9 | 575.3 | 217.8 |
| Spain           | 153.9  | 196.9  | 116.4  | 1.1  | 1.4  | 0.9  | 30.7  | 38.2  | 24.5  |
| Sri Lanka       | 482.6  | 578.9  | 398.8  | 5.1  | 7.1  | 3.6  | 153.7 | 220   | 106   |
| Sudan           | 1179.8 | 1471.9 | 886.3  | 8.9  | 15.1 | 5.1  | 236.4 | 405.7 | 133.5 |
| Suriname        | 165.5  | 207    | 126.6  | 2.1  | 2.8  | 1.6  | 65.2  | 86.7  | 47.6  |
| Swaziland       | 1105.5 | 1514.9 | 725.1  | 13   | 20.9 | 6.2  | 426.5 | 711.1 | 192.2 |
| Sweden          | 118.6  | 155.7  | 86.3   | 0.7  | 0.8  | 0.6  | 19.3  | 22.6  | 16.6  |
| Switzerland     | 206.6  | 263.6  | 157.9  | 1.3  | 1.7  | 1    | 36.9  | 46.7  | 29.1  |
| Syria           | 883.5  | 1050.5 | 727.4  | 4.9  | 6.9  | 3.4  | 117.2 | 165.7 | 80.9  |
| Taiwan          | 1794.8 | 2144.7 | 1513.2 | 9.8  | 13   | 7.2  | 295.7 | 393.7 | 217.1 |
| Tajikistan      | 658.2  | 860.3  | 466.6  | 7.4  | 10.1 | 5.3  | 233.3 | 317.8 | 167.1 |
| Tanzania        | 1648.9 | 1983.5 | 1359.7 | 5.7  | 8    | 3.6  | 173.2 | 249.7 | 112.4 |
| Thailand        | 1121.2 | 1376.8 | 902.4  | 13   | 17.8 | 9.1  | 406.3 | 552   | 288   |
| Timor-Leste     | 1057   | 1415.8 | 764.4  | 9.8  | 14.6 | 5.7  | 287.6 | 425.3 | 149.8 |
| Tobago          | 139.5  | 175.9  | 111.6  | 1.4  | 2    | 1    | 44.5  | 63.9  | 29.9  |
| Tobago          | 139.5  | 175.9  | 111.6  | 1.4  | 2    | 1    | 44.5  | 63.9  | 29.9  |
| Togo            | 1479.2 | 1789.4 | 1196.9 | 16.9 | 22.9 | 12.2 | 504.5 | 682.9 | 359.5 |
| Tokelau         | 2147.7 | 2676.8 | 1630.1 | 10.6 | 14.1 | 7.8  | 324.8 | 449.7 | 228.3 |

|                      |        |        |        |      |      |      |       |       |       |
|----------------------|--------|--------|--------|------|------|------|-------|-------|-------|
| Tonga                | 1381.5 | 1738   | 1068.2 | 22.3 | 29   | 16.8 | 703.3 | 930.4 | 525.7 |
| Tunisia              | 452.6  | 591    | 327.2  | 1.7  | 2.5  | 1.1  | 45.9  | 67.4  | 30.9  |
| Turkey               | 607.5  | 742.9  | 491.9  | 4.1  | 5.4  | 3    | 98.6  | 128.1 | 74.9  |
| Turkmenistan         | 631.5  | 843    | 469.4  | 10.7 | 14.8 | 7.7  | 398.4 | 543.5 | 286.4 |
| Tuvalu               | 1792.8 | 2299   | 1379.4 | 12.2 | 17   | 8.4  | 390.7 | 554.8 | 265.2 |
| Uganda               | 1673.6 | 2052   | 1292.1 | 7.1  | 9.9  | 4.9  | 219.9 | 304.8 | 150.6 |
| UK                   | 181.1  | 226.4  | 139.9  | 1.4  | 1.6  | 1.2  | 42.8  | 49.1  | 37.1  |
| Ukraine              | 210    | 276.4  | 152.1  | 6.2  | 7.8  | 4.8  | 248.6 | 318   | 192.1 |
| United Arab Emirates | 326.2  | 425.9  | 238.5  | 4.7  | 7.3  | 2.9  | 125.8 | 198.6 | 78.3  |
| Uruguay              | 89.6   | 110.3  | 70.9   | 1.3  | 1.7  | 1    | 35.3  | 45.7  | 27    |
| USA                  | 59.9   | 77.8   | 43.2   | 0.9  | 1    | 0.8  | 26.2  | 30.2  | 22.8  |
| Uzbekistan           | 1143.4 | 1517.6 | 844.8  | 10.2 | 13.5 | 7.6  | 332.2 | 441.3 | 247.2 |
| Vanuatu              | 1659.5 | 2092.6 | 1227.1 | 14.1 | 19.3 | 9.5  | 454.2 | 645.6 | 298.8 |
| Venezuela            | 186.9  | 246.8  | 126.7  | 0.9  | 1.4  | 0.6  | 28.1  | 40.2  | 19.3  |
| Vietnam              | 1772.5 | 2184.5 | 1436.6 | 7.9  | 10.8 | 5.7  | 226.5 | 311.8 | 161.7 |
| Virgin Islands       | 121.5  | 148.4  | 98.3   | 2.1  | 2.7  | 1.5  | 60.9  | 82.8  | 43.9  |
| Yemen                | 2078.2 | 2507.6 | 1699.7 | 7.1  | 10.7 | 4.5  | 190.1 | 284.2 | 123.6 |
| Zambia               | 1987   | 2669.5 | 1419   | 10.5 | 14.7 | 7.4  | 324.1 | 461.6 | 223.8 |
| Zimbabwe             | 2380.5 | 2980.6 | 1857.5 | 10.5 | 14.4 | 7.4  | 333.5 | 464.3 | 226.3 |

**Table S5** Country-wise incidence, deaths and DALYs change of hepatitis B from 1990 to 2019

| location | incidence-<br>case_19<br>90 | incidence-<br>case_20<br>19 | incidence<br>changes<br>number | incidence<br>changes<br>percent | deaths-<br>case_19<br>90 | deaths-<br>case_20<br>19 | deaths<br>changes<br>number | deaths<br>changes<br>percent | DALYs<br>-<br>case_19<br>90 | DALYs<br>-<br>case_20<br>19 | DALYs<br>changes<br>number | DALYs<br>changes<br>percent |
|----------|-----------------------------|-----------------------------|--------------------------------|---------------------------------|--------------------------|--------------------------|-----------------------------|------------------------------|-----------------------------|-----------------------------|----------------------------|-----------------------------|
|----------|-----------------------------|-----------------------------|--------------------------------|---------------------------------|--------------------------|--------------------------|-----------------------------|------------------------------|-----------------------------|-----------------------------|----------------------------|-----------------------------|

|                        |               |               |                   |        |         |         |         |        |              |              |              |        |
|------------------------|---------------|---------------|-------------------|--------|---------|---------|---------|--------|--------------|--------------|--------------|--------|
| Afghanistan            | 242087.<br>29 | 611947.<br>28 | 369859.<br>99     | 152.78 | 2086.28 | 2245.11 | 158.83  | 7.61   | 71380.0      | 85644.3      | 14264.3      | 19.98  |
| Albania                | 11217.8<br>0  | 5590.73       | -<br>5627.07      | -50.16 | 159.95  | 123.37  | -36.58  | -22.87 | 4768.54      | 3191.87      | -            | -33.06 |
| Algeria                | 228352.<br>14 | 248668.<br>92 | 20316.7<br>8      | 8.90   | 1066.82 | 1131.81 | 64.99   | 6.09   | 36082.6<br>0 | 32658.6<br>7 | -<br>3423.93 | -9.49  |
| American<br>Samoa      | 978.97        | 976.91        | -2.06             | -0.21  | 2.65    | 4.71    | 2.06    | 77.63  | 97.25        | 155.49       | 58.24        | 59.88  |
| Andorra                | 173.66        | 156.47        | -17.19            | -9.90  | 1.74    | 2.79    | 1.06    | 60.93  | 55.13        | 76.33        | 21.20        | 38.45  |
| Angola                 | 423586.<br>07 | 854715.<br>20 | 431129.<br>13     | 101.78 | 1161.79 | 1737.37 | 575.58  | 49.54  | 43756.6<br>9 | 64898.6<br>7 | 21141.9<br>8 | 48.32  |
| Antigua and<br>Barbuda | 131.86        | 125.92        | -5.95             | -4.51  | 2.46    | 1.55    | -0.91   | -36.87 | 71.76        | 45.30        | -26.46       | -36.87 |
| Argentina              | 58240.6<br>5  | 66050.3<br>3  | 7809.68           | 13.41  | 1018.86 | 1011.65 | -7.21   | -0.71  | 31033.0<br>0 | 27776.8<br>7 | -<br>3256.13 | -10.49 |
| Armenia                | 29297.6<br>5  | 17602.9<br>3  | -<br>11694.7<br>2 | -39.92 | 120.64  | 231.77  | 111.13  | 92.12  | 3808.63      | 5807.11      | 1998.48      | 52.47  |
| Australia              | 174184.<br>14 | 175555.<br>68 | 1371.54           | 0.79   | 333.21  | 537.45  | 204.24  | 61.29  | 10573.6<br>9 | 15176.1<br>0 | 4602.42      | 43.53  |
| Austria                | 18616.2<br>5  | 13543.1<br>9  | -<br>5073.06      | -27.25 | 272.99  | 166.89  | -106.10 | -38.87 | 8336.68      | 4375.61      | -<br>3961.07 | -47.51 |
| Azerbaijan             | 85911.4<br>5  | 104552.<br>40 | 18640.9<br>5      | 21.70  | 468.73  | 698.15  | 229.42  | 48.94  | 16131.7<br>4 | 21344.2<br>8 | 5212.54      | 32.31  |
| Bahamas                | 584.49        | 633.26        | 48.76             | 8.34   | 9.26    | 8.11    | -1.15   | -12.38 | 324.22       | 271.79       | -52.43       | -16.17 |



|                          |         |         |         |        |         |         |         |        |         |         |         |        |
|--------------------------|---------|---------|---------|--------|---------|---------|---------|--------|---------|---------|---------|--------|
| Brunei Darussalam        | 3111.78 | 2074.95 | -       | -33.32 | 15.48   | 31.23   | 15.75   | 101.73 | 591.59  | 1119.13 | 527.54  | 89.17  |
| Bulgaria                 | 83344.2 | 35964.2 | -       | -56.85 | 881.76  | 635.00  | -246.76 | -27.98 | 26927.3 | 19119.6 | -       | -29.00 |
|                          | 3       | 5       | 47379.9 |        |         |         |         |        | 7       | 1       | 7807.76 |        |
|                          |         |         | 8       |        |         |         |         |        |         |         |         |        |
| Burkina Faso             | 340201. | 642652. | 302451. | 88.90  | 1299.96 | 1401.50 | 101.54  | 7.81   | 41779.2 | 50237.7 | 8458.57 | 20.25  |
|                          | 28      | 32      | 04      |        |         |         |         |        | 0       | 7       |         |        |
| Burundi                  | 74413.7 | 93324.1 | 18910.4 | 25.41  | 361.52  | 358.35  | -3.17   | -0.88  | 12698.6 | 13428.4 | 729.79  | 5.75   |
|                          | 0       | 9       | 9       |        |         |         |         |        | 3       | 2       |         |        |
| Cabo Verde               | 7766.27 | 8983.43 | 1217.16 | 15.67  | 36.94   | 73.42   | 36.48   | 98.76  | 1240.34 | 2332.08 | 1091.73 | 88.02  |
| Cambodia                 | 293098. | 309204. | 16106.6 | 5.50   | 1868.09 | 2445.73 | 577.64  | 30.92  | 72142.1 | 85917.2 | 13775.0 | 19.09  |
|                          | 22      | 90      | 8       |        |         |         |         |        | 5       | 2       | 7       |        |
| Cameroon                 | 213770. | 385905. | 172134. | 80.52  | 1399.74 | 2091.73 | 692.00  | 49.44  | 51046.4 | 80220.2 | 29173.7 | 57.15  |
|                          | 95      | 41      | 46      |        |         |         |         |        | 3       | 2       | 9       |        |
| Canada                   | 168698. | 186964. | 18265.8 | 10.83  | 197.06  | 445.15  | 248.09  | 125.90 | 5882.08 | 11569.6 | 5687.61 | 96.69  |
|                          | 71      | 58      | 7       |        |         |         |         |        |         | 9       |         |        |
| Central African Republic | 112910. | 165749. | 52839.0 | 46.80  | 298.80  | 363.10  | 64.30   | 21.52  | 10946.0 | 13828.7 | 2882.75 | 26.34  |
|                          | 81      | 82      | 0       |        |         |         |         |        | 4       | 9       |         |        |
| Chad                     | 186580. | 410978. | 224397. | 120.27 | 958.00  | 1793.18 | 835.18  | 87.18  | 33575.6 | 68979.9 | 35404.3 | 105.45 |
|                          | 50      | 41      | 91      |        |         |         |         |        | 4       | 9       | 4       |        |
| Chile                    | 31783.3 | 38986.8 | 7203.51 | 22.66  | 682.00  | 598.12  | -83.88  | -12.30 | 22618.5 | 16768.4 | -       | -25.86 |
|                          | 0       | 1       |         |        |         |         |         |        | 7       | 2       | 5850.15 |        |
| China                    | 334294  | 233557  | -       | -30.13 | 228717. | 162084. | -       | -29.13 | 803409  | 497905  | -       | -38.03 |
|                          | 16.83   | 42.17   | 100736  |        | 85      | 99      | 66632.8 |        | 4.25    | 7.58    | 305503  |        |
|                          |         |         | 74.66   |        |         |         | 6       |        |         |         | 6.67    |        |



|                                  |           |           |            |        |         |         |         |        |           |           |           |        |
|----------------------------------|-----------|-----------|------------|--------|---------|---------|---------|--------|-----------|-----------|-----------|--------|
| Colombia                         | 360112.08 | 254806.72 | -105305.36 | -29.24 | 230.96  | 355.43  | 124.46  | 53.89  | 8202.19   | 10136.51  | 1934.31   | 23.58  |
| Comoros                          | 8114.76   | 8489.42   | 374.66     | 4.62   | 25.05   | 34.88   | 9.83    | 39.24  | 832.95    | 1165.01   | 332.06    | 39.87  |
| Cook Islands                     | 320.22    | 157.77    | -162.44    | -50.73 | 1.68    | 1.84    | 0.16    | 9.74   | 54.40     | 54.36     | -0.04     | -0.08  |
| Costa Rica                       | 9462.61   | 9908.09   | 445.48     | 4.71   | 39.69   | 68.96   | 29.28   | 73.78  | 1420.15   | 2062.90   | 642.74    | 45.26  |
| Cote d'Ivoire                    | 464949.84 | 568496.46 | 103546.62  | 22.27  | 1481.70 | 2169.12 | 687.42  | 46.39  | 57545.13  | 81797.17  | 24252.04  | 42.14  |
| Croatia                          | 22597.58  | 12883.85  | -9713.72   | -42.99 | 610.55  | 262.62  | -347.94 | -56.99 | 19264.44  | 6989.08   | -12275.36 | -63.72 |
| Cuba                             | 16145.54  | 9539.64   | -6605.90   | -40.91 | 321.22  | 242.31  | -78.91  | -24.57 | 9289.61   | 6696.75   | -2592.86  | -27.91 |
| Cyprus                           | 3357.81   | 3083.39   | -274.42    | -8.17  | 14.90   | 16.13   | 1.23    | 8.23   | 396.29    | 402.31    | 6.03      | 1.52   |
| Czech Republic                   | 29614.21  | 20886.34  | -8727.87   | -29.47 | 793.24  | 505.51  | -287.74 | -36.27 | 25211.25  | 14614.93  | -10596.31 | -42.03 |
| Democratic Republic of the Congo | 539068.08 | 948213.60 | 409145.52  | 75.90  | 3439.25 | 4459.57 | 1020.32 | 29.67  | 124557.71 | 168516.71 | 43959.01  | 35.29  |
| Denmark                          | 12129.05  | 12059.95  | -69.10     | -0.57  | 112.58  | 155.90  | 43.33   | 38.49  | 3774.18   | 4194.00   | 419.82    | 11.12  |
| Djibouti                         | 8900.50   | 16656.43  | 7755.93    | 87.14  | 20.85   | 54.90   | 34.05   | 163.30 | 815.51    | 2030.06   | 1214.55   | 148.93 |
| Dominica                         | 166.03    | 120.98    | -45.05     | -27.13 | 3.18    | 1.46    | -1.72   | -54.07 | 91.33     | 42.03     | -49.30    | -53.98 |

|                    |                |                |                   |        |              |              |         |        |               |               |                   |        |
|--------------------|----------------|----------------|-------------------|--------|--------------|--------------|---------|--------|---------------|---------------|-------------------|--------|
| Dominican Republic | 21189.1<br>1   | 22997.6<br>8   | 1808.57<br>8      | 8.54   | 230.38       | 361.33       | 130.95  | 56.84  | 8153.76       | 11323.1<br>5  | 3169.39           | 38.87  |
| Ecuador            | 29679.4<br>3   | 43463.9<br>1   | 13784.4<br>8      | 46.44  | 262.05       | 459.78       | 197.73  | 75.45  | 8748.84       | 12466.3<br>5  | 3717.51           | 42.49  |
| Egypt              | 171501<br>4.13 | 191675<br>8.92 | 201744.<br>79     | 11.76  | 17552.2<br>1 | 19189.6<br>0 | 1637.40 | 9.33   | 467308.<br>33 | 501700.<br>20 | 34391.8<br>7      | 7.36   |
| El Salvador        | 17783.5<br>0   | 10899.9<br>9   | -<br>6883.51      | -38.71 | 78.62        | 66.97        | -11.65  | -14.82 | 2898.68       | 2116.65       | -782.03           | -26.98 |
| Equatorial Guinea  | 2545.85        | 7223.71        | 4677.86           | 183.74 | 37.89        | 46.70        | 8.80    | 23.23  | 1345.51       | 1707.06       | 361.55            | 26.87  |
| Eritrea            | 67733.6<br>8   | 85408.3<br>3   | 17674.6<br>5      | 26.09  | 180.71       | 307.31       | 126.60  | 70.06  | 6940.15       | 11885.4<br>6  | 4945.32           | 71.26  |
| Estonia            | 2992.36        | 1628.27        | -<br>1364.09      | -45.59 | 43.59        | 49.25        | 5.66    | 12.99  | 1458.29       | 1516.48       | 58.19             | 3.99   |
| Eswatini           | 18092.4<br>8   | 11932.8<br>7   | -<br>6159.61      | -34.05 | 46.83        | 89.75        | 42.93   | 91.68  | 1706.23       | 3376.29       | 1670.07           | 97.88  |
| Ethiopia           | 726071.<br>52  | 104069<br>3.97 | 314622.<br>45     | 43.33  | 4506.77      | 6347.82      | 1841.05 | 40.85  | 160017.<br>64 | 215942.<br>02 | 55924.3<br>8      | 34.95  |
| Fiji               | 16007.4<br>5   | 8868.28        | -<br>7139.17      | -44.60 | 37.20        | 50.70        | 13.50   | 36.29  | 1407.98       | 1726.59       | 318.61            | 22.63  |
| Finland            | 12256.1<br>5   | 11176.0<br>5   | -<br>1080.10      | -8.81  | 102.93       | 190.47       | 87.54   | 85.06  | 3427.49       | 5281.52       | 1854.04           | 54.09  |
| France             | 339813.<br>80  | 270305.<br>78  | -<br>69508.0<br>3 | -20.45 | 2031.04      | 1750.26      | -280.78 | -13.82 | 58809.9<br>5  | 44447.2<br>1  | -<br>14362.7<br>4 | -24.42 |

|               |               |               |               |        |         |         |         |        |              |               |              |        |
|---------------|---------------|---------------|---------------|--------|---------|---------|---------|--------|--------------|---------------|--------------|--------|
| Gabon         | 22548.6<br>4  | 26033.1<br>2  | 3484.48       | 15.45  | 105.28  | 110.89  | 5.61    | 5.33   | 3543.29      | 3807.15       | 263.85       | 7.45   |
| Gambia        | 27486.4<br>4  | 30145.3<br>4  | 2658.91       | 9.67   | 162.36  | 385.61  | 223.25  | 137.51 | 5757.91      | 13502.2<br>1  | 7744.30      | 134.50 |
| Georgia       | 30361.1<br>2  | 16744.9<br>8  | -<br>13616.1  | -44.85 | 494.15  | 367.41  | -126.74 | -25.65 | 15435.8<br>7 | 11546.7<br>1  | -<br>3889.16 | -25.20 |
| Germany       | 119854.<br>26 | 94636.0<br>9  | -<br>25218.1  | -21.04 | 2900.44 | 1980.73 | -919.71 | -31.71 | 87825.0<br>0 | 49355.5<br>3  | -<br>38469.4 | -43.80 |
| Ghana         | 609929.<br>68 | 839861.<br>84 | 229932.<br>17 | 37.70  | 2339.24 | 3118.46 | 779.22  | 33.31  | 82476.9<br>5 | 109765.<br>08 | 27288.1<br>2 | 33.09  |
| Greece        | 71277.2<br>3  | 50137.7<br>6  | -<br>21139.4  | -29.66 | 323.58  | 372.48  | 48.91   | 15.11  | 7600.36      | 8169.45       | 569.09       | 7.49   |
| Greenland     | 249.22        | 208.96        | -40.26        | -16.15 | 0.61    | 1.12    | 0.51    | 82.47  | 23.97        | 36.42         | 12.45        | 51.91  |
| Grenada       | 214.72        | 188.83        | -25.89        | -12.06 | 3.88    | 2.14    | -1.75   | -45.01 | 118.70       | 65.89         | -52.81       | -44.49 |
| Guam          | 2916.13       | 3032.63       | 116.50        | 4.00   | 9.74    | 20.29   | 10.55   | 108.34 | 343.91       | 640.35        | 296.44       | 86.20  |
| Guatemala     | 47161.6<br>9  | 76907.6<br>8  | 29745.9<br>9  | 63.07  | 213.25  | 286.27  | 73.02   | 34.24  | 8218.26      | 10395.8<br>2  | 2177.57      | 26.50  |
| Guinea        | 227150.<br>21 | 368717.<br>14 | 141566.<br>93 | 62.32  | 1561.63 | 2266.92 | 705.30  | 45.16  | 52487.1<br>3 | 79485.6<br>9  | 26998.5<br>6 | 51.44  |
| Guinea-Bissau | 37019.9<br>9  | 52457.0<br>9  | 15437.1<br>0  | 41.70  | 194.60  | 240.95  | 46.35   | 23.82  | 7250.95      | 9168.81       | 1917.86      | 26.45  |
| Guyana        | 2758.63       | 1933.32       | -825.31       | -29.92 | 37.23   | 24.49   | -12.74  | -34.22 | 1373.20      | 859.80        | -513.39      | -37.39 |

|           |                |                 |                    |        |              |               |              |        |                |                |                   |        |
|-----------|----------------|-----------------|--------------------|--------|--------------|---------------|--------------|--------|----------------|----------------|-------------------|--------|
| Haiti     | 31384.0<br>7   | 52555.6<br>4    | 21171.5<br>8       | 67.46  | 260.18       | 374.15        | 113.97       | 43.81  | 9365.24        | 13133.9<br>5   | 3768.71           | 40.24  |
| Honduras  | 27459.7<br>8   | 35884.9<br>4    | 8425.17            | 30.68  | 111.08       | 248.52        | 137.44       | 123.73 | 4001.64        | 7508.19        | 3506.55           | 87.63  |
| Hungary   | 41379.9<br>2   | 37329.9<br>1    | -<br>4050.02       | -9.79  | 2006.09      | 1114.70       | -891.39      | -44.43 | 68990.0<br>9   | 32595.1<br>1   | -<br>36394.9<br>8 | -52.75 |
| Iceland   | 447.44         | 518.83          | 71.39              | 15.96  | 2.59         | 4.55          | 1.96         | 75.72  | 76.99          | 124.08         | 47.09             | 61.17  |
| India     | 935942<br>5.48 | 115152<br>50.27 | 215582<br>4.79     | 23.03  | 60291.3<br>6 | 110371.<br>76 | 50080.4<br>0 | 83.06  | 251254<br>8.11 | 408221<br>5.05 | 156966<br>6.94    | 62.47  |
| Indonesia | 297081<br>9.96 | 298300<br>8.02  | 12188.0<br>6       | 0.41   | 18305.6<br>4 | 22613.5<br>6  | 4307.92      | 23.53  | 698495.<br>83  | 726398.<br>35  | 27902.5<br>2      | 3.99   |
| Iran      | 458471.<br>28  | 348898.<br>98   | -<br>109572.<br>30 | -23.90 | 1975.85      | 2470.86       | 495.01       | 25.05  | 66093.2<br>0   | 70179.9<br>8   | 4086.79           | 6.18   |
| Iraq      | 154842.<br>92  | 194695.<br>51   | 39852.5<br>9       | 25.74  | 610.80       | 1093.91       | 483.11       | 79.09  | 20579.3<br>6   | 35067.9<br>2   | 14488.5<br>6      | 70.40  |
| Ireland   | 7180.76        | 6710.72         | -470.05            | -6.55  | 28.77        | 61.47         | 32.70        | 113.64 | 819.79         | 1674.93        | 855.14            | 104.31 |
| Israel    | 11687.7<br>1   | 11322.6<br>4    | -365.07            | -3.12  | 71.30        | 92.58         | 21.28        | 29.84  | 1923.57        | 2270.37        | 346.80            | 18.03  |
| Italy     | 202747.<br>69  | 71860.8<br>4    | -<br>130886.<br>84 | -64.56 | 2854.26      | 1713.85       | -<br>1140.41 | -39.95 | 76004.8<br>8   | 38939.2<br>7   | -<br>37065.6<br>1 | -48.77 |
| Jamaica   | 2848.43        | 2379.61         | -468.81            | -16.46 | 39.35        | 33.72         | -5.64        | -14.32 | 1164.05        | 985.71         | -178.34           | -15.32 |
| Japan     | 131911         | 988653.         | -                  | -25.05 | 6970.57      | 7654.91       | 684.34       | 9.82   | 202242.        | 155087.        | -                 | -23.32 |

|            |         |         |         |        |         |         |         |        |         |         |         |        |
|------------|---------|---------|---------|--------|---------|---------|---------|--------|---------|---------|---------|--------|
|            | 7.59    | 73      | 330463. |        |         |         |         |        | 81      | 90      | 47154.9 |        |
|            |         |         | 86      |        |         |         |         |        |         |         | 1       |        |
| Jordan     | 86131.9 | 90600.9 | 4469.04 | 5.19   | 99.67   | 165.64  | 65.96   | 66.18  | 3317.77 | 5050.94 | 1733.17 | 52.24  |
|            | 4       | 8       |         |        |         |         |         |        |         |         |         |        |
| Kazakhstan | 145408. | 96227.1 | -       | -33.82 | 772.23  | 1337.35 | 565.12  | 73.18  | 27364.2 | 45021.8 | 17657.5 | 64.53  |
|            | 29      | 4       | 49181.1 |        |         |         |         |        | 5       | 0       | 5       |        |
|            |         |         | 5       |        |         |         |         |        |         |         |         |        |
| Kenya      | 378554. | 538300. | 159745. | 42.20  | 1582.77 | 3091.59 | 1508.82 | 95.33  | 54004.3 | 110902. | 56897.7 | 105.36 |
|            | 39      | 14      | 75      |        |         |         |         |        | 9       | 08      | 0       |        |
| Kiribati   | 2292.93 | 2383.63 | 90.70   | 3.96   | 16.17   | 16.03   | -0.15   | -0.90  | 649.53  | 632.13  | -17.40  | -2.68  |
| Kuwait     | 8041.08 | 10791.4 | 2750.39 | 34.20  | 27.40   | 55.92   | 28.52   | 104.09 | 1004.02 | 1746.54 | 742.52  | 73.95  |
|            |         | 7       |         |        |         |         |         |        |         |         |         |        |
| Kyrgyzstan | 43932.9 | 42040.3 | -       | -4.31  | 325.18  | 404.17  | 78.99   | 24.29  | 12624.9 | 15155.2 | 2530.26 | 20.04  |
|            | 9       | 9       | 1892.60 |        |         |         |         |        | 9       | 5       |         |        |
| Laos       | 108730. | 144467. | 35736.7 | 32.87  | 526.44  | 519.18  | -7.27   | -1.38  | 19632.9 | 18347.0 | -       | -6.55  |
|            | 33      | 03      | 0       |        |         |         |         |        | 0       | 1       | 1285.89 |        |
| Latvia     | 3564.88 | 1568.79 | -       | -55.99 | 87.34   | 67.05   | -20.29  | -23.24 | 3348.54 | 2098.95 | -       | -37.32 |
|            |         |         | 1996.09 |        |         |         |         |        |         |         | 1249.59 |        |
| Lebanon    | 40889.7 | 45756.5 | 4866.82 | 11.90  | 259.53  | 311.59  | 52.07   | 20.06  | 6932.01 | 7187.99 | 255.98  | 3.69   |
|            | 5       | 7       |         |        |         |         |         |        |         |         |         |        |
| Lesotho    | 40987.9 | 30620.6 | -       | -25.29 | 139.99  | 168.38  | 28.39   | 20.28  | 4809.48 | 6038.35 | 1228.87 | 25.55  |
|            | 4       | 9       | 10367.2 |        |         |         |         |        |         |         |         |        |
|            |         |         | 4       |        |         |         |         |        |         |         |         |        |
| Liberia    | 59638.5 | 113622. | 53983.4 | 90.52  | 429.38  | 518.50  | 89.11   | 20.75  | 14276.4 | 18868.9 | 4592.47 | 32.17  |
|            | 8       | 00      | 2       |        |         |         |         |        | 9       | 6       |         |        |

|                     |               |               |                   |        |         |         |         |        |              |              |              |        |
|---------------------|---------------|---------------|-------------------|--------|---------|---------|---------|--------|--------------|--------------|--------------|--------|
| Libya               | 36129.2<br>4  | 40728.9<br>7  | 4599.73           | 12.73  | 202.28  | 257.09  | 54.81   | 27.10  | 6549.10      | 8002.62      | 1453.52      | 22.19  |
| Lithuania           | 7456.72       | 3258.66       | -<br>4198.06      | -56.30 | 101.32  | 132.06  | 30.75   | 30.35  | 3492.11      | 4341.11      | 848.99       | 24.31  |
| Luxembourg          | 993.01        | 1118.97       | 125.96            | 12.68  | 12.83   | 9.71    | -3.12   | -24.29 | 382.30       | 264.65       | -117.66      | -30.78 |
| Macedonia           | 6873.50       | 6007.15       | -866.35           | -12.60 | 102.80  | 123.88  | 21.08   | 20.51  | 3197.63      | 3479.56      | 281.93       | 8.82   |
| Madagascar          | 258590.<br>22 | 332536.<br>17 | 73945.9<br>5      | 28.60  | 834.22  | 960.24  | 126.02  | 15.11  | 30944.0<br>5 | 36767.6<br>4 | 5823.58      | 18.82  |
| Malawi              | 268448.<br>09 | 310592.<br>71 | 42144.6<br>3      | 15.70  | 849.99  | 712.52  | -137.47 | -16.17 | 30672.6<br>1 | 26500.5<br>0 | -<br>4172.11 | -13.60 |
| Malaysia            | 149821.<br>64 | 174285.<br>14 | 24463.5<br>0      | 16.33  | 1263.92 | 3000.83 | 1736.91 | 137.42 | 40935.9<br>5 | 88428.0<br>5 | 47492.0<br>9 | 116.02 |
| Maldives            | 2360.67       | 3539.79       | 1179.12           | 49.95  | 11.97   | 15.10   | 3.13    | 26.15  | 430.84       | 505.03       | 74.19        | 17.22  |
| Mali                | 148956.<br>31 | 278766.<br>51 | 129810.<br>20     | 87.15  | 1882.96 | 2206.75 | 323.79  | 17.20  | 69046.1<br>9 | 80968.7<br>7 | 11922.5<br>8 | 17.27  |
| Malta               | 693.23        | 462.51        | -230.72           | -33.28 | 5.18    | 5.31    | 0.13    | 2.58   | 151.69       | 137.54       | -14.15       | -9.33  |
| Marshall<br>Islands | 978.16        | 831.63        | -146.53           | -14.98 | 4.38    | 5.55    | 1.17    | 26.66  | 165.97       | 208.74       | 42.78        | 25.77  |
| Mauritania          | 116138.<br>06 | 147124.<br>62 | 30986.5<br>6      | 26.68  | 361.99  | 334.54  | -27.46  | -7.58  | 11831.9<br>1 | 10958.3<br>3 | -873.58      | -7.38  |
| Mauritius           | 13150.9<br>7  | 9132.87       | -<br>4018.10      | -30.55 | 106.64  | 76.08   | -30.56  | -28.66 | 3886.29      | 2455.44      | -<br>1430.85 | -36.82 |
| Mexico              | 126977.<br>32 | 98854.2<br>4  | -<br>28123.0<br>8 | -22.15 | 1440.85 | 2125.36 | 684.51  | 47.51  | 54268.0<br>5 | 68854.0<br>5 | 14586.0<br>0 | 26.88  |



|                          |         |         |         |        |         |         |         |        |         |         |         |        |
|--------------------------|---------|---------|---------|--------|---------|---------|---------|--------|---------|---------|---------|--------|
| New Zealand              | 12217.1 | 8517.41 | -       | -30.28 | 52.16   | 88.18   | 36.02   | 69.07  | 1556.49 | 2371.18 | 814.70  | 52.34  |
|                          | 1       |         | 3699.71 |        |         |         |         |        |         |         |         |        |
| Nicaragua                | 20564.3 | 16912.7 | -       | -17.76 | 40.66   | 75.32   | 34.65   | 85.22  | 1581.78 | 2442.24 | 860.46  | 54.40  |
|                          | 3       | 3       | 3651.61 |        |         |         |         |        |         |         |         |        |
| Niger                    | 314008. | 604232. | 290224. | 92.43  | 934.95  | 1688.15 | 753.20  | 80.56  | 36187.1 | 63667.2 | 27480.0 | 75.94  |
|                          | 25      | 57      | 32      |        |         |         |         |        | 9       | 3       | 3       |        |
| Nigeria                  | 322663  | 527375  | 204712  | 63.44  | 14457.6 | 20245.2 | 5787.62 | 40.03  | 495207. | 708162. | 212954. | 43.00  |
|                          | 3.88    | 8.03    | 4.15    |        | 2       | 4       |         |        | 76      | 46      | 70      |        |
| Niue                     | 43.67   | 16.42   | -27.25  | -62.41 | 0.31    | 0.19    | -0.12   | -40.11 | 9.54    | 5.52    | -4.02   | -42.11 |
| North Korea              | 691708. | 641787. | -       | -7.22  | 3389.95 | 3728.04 | 338.09  | 9.97   | 122503. | 121062. | -       | -1.18  |
|                          | 06      | 45      | 49920.6 |        |         |         |         |        | 17      | 67      | 1440.51 |        |
|                          |         |         | 1       |        |         |         |         |        |         |         |         |        |
| Northern Mariana Islands | 1285.36 | 1075.85 | -209.51 | -16.30 | 5.06    | 8.07    | 3.01    | 59.61  | 207.16  | 259.30  | 52.15   | 25.17  |
| Norway                   | 7635.32 | 5091.43 | -       | -33.32 | 54.97   | 51.55   | -3.42   | -6.22  | 1523.85 | 1325.84 | -198.01 | -12.99 |
|                          |         |         | 2543.89 |        |         |         |         |        |         |         |         |        |
| Oman                     | 43652.8 | 48810.9 | 5158.09 | 11.82  | 61.68   | 83.60   | 21.92   | 35.53  | 2061.06 | 2964.87 | 903.81  | 43.85  |
|                          | 5       | 4       |         |        |         |         |         |        |         |         |         |        |
| Pakistan                 | 131691  | 175682  | 439908. | 33.40  | 9656.98 | 16207.7 | 6550.76 | 67.83  | 346678. | 610162. | 263484. | 76.00  |
|                          | 9.65    | 8.46    | 81      |        |         | 4       |         |        | 38      | 86      | 47      |        |
| Palau                    | 312.66  | 220.59  | -92.07  | -29.45 | 1.73    | 2.75    | 1.02    | 59.09  | 62.76   | 96.32   | 33.56   | 53.48  |
| Palestine                | 23744.2 | 19037.1 | -       | -19.82 | 88.69   | 119.83  | 31.14   | 35.11  | 2537.22 | 3523.47 | 986.25  | 38.87  |
|                          | 7       | 7       | 4707.10 |        |         |         |         |        |         |         |         |        |
| Panama                   | 5722.29 | 5460.10 | -262.19 | -4.58  | 22.99   | 34.31   | 11.32   | 49.23  | 800.95  | 1010.73 | 209.78  | 26.19  |



|                   |     |         |         |         |        |         |         |         |        |         |         |         |        |
|-------------------|-----|---------|---------|---------|--------|---------|---------|---------|--------|---------|---------|---------|--------|
| Papua             | New | 121072. | 181740. | 60667.8 | 50.11  | 159.37  | 289.38  | 130.01  | 81.58  | 7049.58 | 12069.9 | 5020.35 | 71.21  |
| Guinea            |     | 71      | 59      | 8       |        |         |         |         |        |         | 3       |         |        |
| Paraguay          |     | 50560.6 | 62914.1 | 12353.5 | 24.43  | 73.27   | 118.48  | 45.21   | 61.70  | 2467.83 | 3866.18 | 1398.35 | 56.66  |
|                   |     | 4       | 4       | 0       |        |         |         |         |        |         |         |         |        |
| Peru              |     | 62187.5 | 87821.4 | 25633.8 | 41.22  | 815.26  | 846.30  | 31.04   | 3.81   | 27079.0 | 24254.3 | -       | -10.43 |
|                   |     | 7       | 1       | 4       |        |         |         |         |        | 0       | 5       | 2824.65 |        |
| Philippines       |     | 235399  | 189783  | -       | -19.38 | 4962.60 | 6056.56 | 1093.96 | 22.04  | 188092. | 212648. | 24556.2 | 13.06  |
|                   |     | 1.09    | 7.29    | 456153. |        |         |         |         |        | 61      | 88      | 7       |        |
|                   |     |         |         | 81      |        |         |         |         |        |         |         |         |        |
| Poland            |     | 147644. | 46274.8 | -       | -68.66 | 2540.50 | 1754.84 | -785.66 | -30.93 | 73511.2 | 54925.3 | -       | -25.28 |
|                   |     | 73      | 2       | 101369. |        |         |         |         |        | 0       | 2       | 18585.8 |        |
|                   |     |         |         | 91      |        |         |         |         |        |         |         | 7       |        |
| Portugal          |     | 31718.0 | 17726.0 | -       | -44.11 | 443.95  | 258.16  | -185.79 | -41.85 | 13595.5 | 6937.07 | -       | -48.98 |
|                   |     | 5       | 0       | 13992.0 |        |         |         |         |        | 4       |         | 6658.46 |        |
|                   |     |         |         | 6       |        |         |         |         |        |         |         |         |        |
| Puerto Rico       |     | 7020.55 | 4069.32 | -       | -42.04 | 199.03  | 107.86  | -91.18  | -45.81 | 6130.68 | 2777.62 | -       | -54.69 |
|                   |     |         |         | 2951.23 |        |         |         |         |        |         |         | 3353.06 |        |
| Qatar             |     | 4894.45 | 18785.1 | 13890.6 | 283.80 | 17.65   | 70.95   | 53.30   | 302.05 | 611.98  | 2417.54 | 1805.56 | 295.04 |
|                   |     |         | 5       | 9       |        |         |         |         |        |         |         |         |        |
| Republic of Congo |     | 66108.9 | 82819.6 | 16710.6 | 25.28  | 240.12  | 311.83  | 71.71   | 29.86  | 8494.14 | 11285.2 | 2791.07 | 32.86  |
|                   |     | 9       | 8       | 9       |        |         |         |         |        |         | 1       |         |        |
| Romania           |     | 99126.6 | 55264.4 | -       | -44.25 | 2649.39 | 2002.85 | -646.54 | -24.40 | 83824.7 | 57274.6 | -       | -31.67 |
|                   |     | 4       | 2       | 43862.2 |        |         |         |         |        | 6       | 1       | 26550.1 |        |
|                   |     |         |         | 2       |        |         |         |         |        |         |         | 6       |        |
| Russia            |     | 323880. | 189247. | -       | -41.57 | 4261.95 | 7098.01 | 2836.06 | 66.54  | 140130. | 249954. | 109824. | 78.37  |

|                                  |         |         |         |        |        |         |         |        |         |         |         |        |
|----------------------------------|---------|---------|---------|--------|--------|---------|---------|--------|---------|---------|---------|--------|
|                                  | 44      | 18      | 134633. |        |        |         |         |        | 41      | 81      | 41      |        |
|                                  |         |         | 25      |        |        |         |         |        |         |         |         |        |
| Rwanda                           | 111671. | 102663. | -       | -8.07  | 427.16 | 343.27  | -83.90  | -19.64 | 16483.6 | 12918.3 | -       | -21.63 |
|                                  | 31      | 15      | 9008.16 |        |        |         |         |        | 4       | 8       | 3565.26 |        |
| Saint Kitts and Nevis            | 121.06  | 125.41  | 4.35    | 3.59   | 2.86   | 1.59    | -1.28   | -44.64 | 84.12   | 48.50   | -35.62  | -42.35 |
| Saint Lucia                      | 334.66  | 332.50  | -2.16   | -0.64  | 4.26   | 3.39    | -0.87   | -20.43 | 135.68  | 103.25  | -32.43  | -23.90 |
| Saint Vincent and the Grenadines | 250.12  | 174.91  | -75.21  | -30.07 | 3.17   | 2.40    | -0.77   | -24.34 | 101.24  | 74.64   | -26.60  | -26.27 |
| Samoa                            | 3609.78 | 3558.61 | -51.18  | -1.42  | 13.51  | 15.92   | 2.41    | 17.81  | 466.74  | 540.46  | 73.71   | 15.79  |
| San Marino                       | 62.22   | 60.15   | -2.08   | -3.34  | 0.66   | 0.79    | 0.14    | 21.13  | 16.65   | 18.06   | 1.41    | 8.49   |
| Sao Tome and Principe            | 3625.79 | 3912.00 | 286.21  | 7.89   | 23.50  | 23.28   | -0.22   | -0.93  | 778.18  | 797.63  | 19.45   | 2.50   |
| Saudi Arabia                     | 350035. | 348966. | -       | -0.31  | 748.95 | 784.46  | 35.51   | 4.74   | 22343.9 | 25312.4 | 2968.44 | 13.29  |
|                                  | 44      | 07      | 1069.37 |        |        |         |         |        | 9       | 4       |         |        |
| Senegal                          | 207529. | 253099. | 45570.6 | 21.96  | 860.14 | 1190.15 | 330.01  | 38.37  | 29494.0 | 40669.8 | 11175.7 | 37.89  |
|                                  | 20      | 85      | 5       |        |        |         |         |        | 3       | 2       | 9       |        |
| Serbia                           | 24831.0 | 16793.0 | -       | -32.37 | 614.23 | 405.64  | -208.59 | -33.96 | 19074.0 | 10950.2 | -       | -42.59 |
|                                  | 1       | 9       | 8037.92 |        |        |         |         |        | 9       | 1       | 8123.88 |        |
| Seychelles                       | 1010.88 | 993.65  | -17.23  | -1.70  | 9.27   | 11.32   | 2.06    | 22.19  | 310.48  | 380.60  | 70.12   | 22.58  |
| Sierra Leone                     | 111450. | 156044. | 44593.4 | 40.01  | 671.20 | 681.32  | 10.12   | 1.51   | 23271.4 | 26093.8 | 2822.41 | 12.13  |
|                                  | 74      | 17      | 3       |        |        |         |         |        | 6       | 7       |         |        |
| Singapore                        | 46626.1 | 52739.7 | 6113.70 | 13.11  | 239.69 | 502.47  | 262.78  | 109.63 | 7201.70 | 12384.1 | 5182.45 | 71.96  |
|                                  | 0       | 9       |         |        |        |         |         |        |         | 5       |         |        |

|                    |               |               |                    |        |              |              |         |        |               |               |                   |        |
|--------------------|---------------|---------------|--------------------|--------|--------------|--------------|---------|--------|---------------|---------------|-------------------|--------|
| Slovakia           | 19782.4<br>9  | 13112.2<br>6  | -<br>6670.23       | -33.72 | 551.27       | 358.85       | -192.42 | -34.90 | 18405.1<br>6  | 11208.3<br>7  | -<br>7196.80      | -39.10 |
| Slovenia           | 8079.53       | 5785.98       | -<br>2293.55       | -28.39 | 248.98       | 146.78       | -102.20 | -41.05 | 8043.81       | 3928.22       | -<br>4115.59      | -51.16 |
| Solomon<br>Islands | 10066.7<br>1  | 9204.05       | -862.66            | -8.57  | 41.51        | 59.29        | 17.79   | 42.85  | 1738.31       | 2484.03       | 745.72            | 42.90  |
| Somalia            | 285427.<br>81 | 713251.<br>55 | 427823.<br>74      | 149.89 | 716.90       | 1596.89      | 879.99  | 122.75 | 27437.9<br>9  | 62593.0<br>0  | 35155.0<br>1      | 128.13 |
| South Africa       | 352922.<br>13 | 215307.<br>27 | -<br>137614.<br>85 | -38.99 | 2010.21      | 2224.26      | 214.05  | 10.65  | 78517.9<br>0  | 78604.9<br>0  | 87.00             | 0.11   |
| South Korea        | 730003.<br>39 | 546400.<br>72 | -<br>183602.<br>66 | -25.15 | 10331.6<br>4 | 11589.0<br>3 | 1257.39 | 12.17  | 362971.<br>43 | 313344.<br>22 | -<br>49627.2<br>2 | -13.67 |
| South Sudan        | 118087.<br>77 | 150622.<br>34 | 32534.5<br>7       | 27.55  | 357.55       | 540.88       | 183.33  | 51.27  | 12426.1<br>8  | 19009.1<br>0  | 6582.92           | 52.98  |
| Spain              | 121854.<br>20 | 84693.5<br>1  | -<br>37160.6<br>9  | -30.50 | 1478.52      | 954.22       | -524.29 | -35.46 | 40574.0<br>8  | 23239.5<br>5  | -<br>17334.5<br>3 | -42.72 |
| Sri Lanka          | 115968.<br>94 | 112864.<br>03 | -<br>3104.91       | -2.68  | 1545.20      | 1273.58      | -271.62 | -17.58 | 55424.3<br>6  | 39144.3<br>2  | -<br>16280.0<br>4 | -29.37 |
| Sudan              | 408960.<br>61 | 452628.<br>41 | 43667.8<br>0       | 10.68  | 2522.94      | 1745.71      | -777.23 | -30.81 | 93941.8<br>9  | 57992.4<br>7  | -<br>35949.4<br>2 | -38.27 |

|             |            |           |            |        |         |          |         |        |           |           |           |        |
|-------------|------------|-----------|------------|--------|---------|----------|---------|--------|-----------|-----------|-----------|--------|
| Suriname    | 962.38     | 988.95    | 26.57      | 2.76   | 15.64   | 13.15    | -2.49   | -15.92 | 543.66    | 412.79    | -130.88   | -24.07 |
| Sweden      | 11162.78   | 10900.94  | -261.84    | -2.35  | 100.34  | 128.78   | 28.43   | 28.34  | 2728.97   | 3040.90   | 311.94    | 11.43  |
| Switzerland | 15197.14   | 16891.74  | 1694.60    | 11.15  | 129.57  | 212.40   | 82.83   | 63.93  | 3759.01   | 5170.13   | 1411.12   | 37.54  |
| Syria       | 244266.66  | 123281.54 | -120985.12 | -49.53 | 506.75  | 552.83   | 46.08   | 9.09   | 16419.92  | 15611.59  | -808.33   | -4.92  |
| Taiwan      | 872905.29  | 591080.32 | -281824.98 | -32.29 | 3734.34 | 3678.86  | -55.48  | -1.49  | 122204.10 | 105679.95 | -16524.15 | -13.52 |
| Tajikistan  | 57403.68   | 62551.24  | 5147.57    | 8.97   | 353.46  | 444.94   | 91.49   | 25.88  | 16368.79  | 17298.37  | 929.57    | 5.68   |
| Tanzania    | 642676.76  | 763977.41 | 121300.65  | 18.87  | 1365.18 | 1601.76  | 236.58  | 17.33  | 48169.73  | 58862.43  | 10692.70  | 22.20  |
| Thailand    | 1256145.09 | 980613.45 | -275531.64 | -21.93 | 6983.26 | 13239.80 | 6256.55 | 89.59  | 250981.55 | 407722.51 | 156740.96 | 62.45  |
| Timor-Leste | 11923.22   | 13503.95  | 1580.74    | 13.26  | 55.00   | 81.65    | 26.65   | 48.46  | 2158.94   | 2600.35   | 441.41    | 20.45  |
| Togo        | 69736.96   | 108520.33 | 38783.37   | 55.61  | 440.90  | 712.94   | 272.04  | 61.70  | 16547.93  | 26155.91  | 9607.98   | 58.06  |
| Tokelau     | 39.98      | 29.46     | -10.52     | -26.32 | 0.19    | 0.14     | -0.05   | -26.17 | 5.81      | 4.33      | -1.48     | -25.44 |
| Tonga       | 2579.06    | 1212.83   | -1366.23   | -52.97 | 18.88   | 18.29    | -0.59   | -3.15  | 662.48    | 599.35    | -63.13    | -9.53  |

|                              |           |           |           |        |         |         |         |        |           |           |           |        |
|------------------------------|-----------|-----------|-----------|--------|---------|---------|---------|--------|-----------|-----------|-----------|--------|
| Trinidad and Tobago          | 2485.91   | 2093.22   | -392.69   | -15.80 | 39.91   | 26.28   | -13.63  | -34.15 | 1359.80   | 796.40    | -563.39   | -41.43 |
| Tunisia                      | 83797.40  | 58480.96  | -25316.44 | -30.21 | 201.71  | 211.48  | 9.77    | 4.84   | 6930.44   | 5967.35   | -963.09   | -13.90 |
| Turkey                       | 628454.59 | 565503.03 | -62951.55 | -10.02 | 3819.11 | 3530.43 | -288.68 | -7.56  | 119530.36 | 89397.99  | -30132.38 | -25.21 |
| Turkmenistan                 | 37181.68  | 33035.95  | -4145.73  | -11.15 | 320.13  | 502.42  | 182.28  | 56.94  | 14984.04  | 19980.14  | 4996.10   | 33.34  |
| Tuvalu                       | 245.63    | 209.88    | -35.75    | -14.55 | 1.43    | 1.27    | -0.16   | -11.47 | 50.00     | 43.13     | -6.87     | -13.74 |
| Uganda                       | 460252.56 | 541155.19 | 80902.64  | 17.58  | 825.34  | 1205.83 | 380.48  | 46.10  | 28432.05  | 45497.58  | 17065.53  | 60.02  |
| UK                           | 92850.80  | 113511.51 | 20660.71  | 22.25  | 588.86  | 1447.07 | 858.21  | 145.74 | 17091.30  | 40027.38  | 22936.07  | 134.20 |
| Ukraine                      | 144961.72 | 92544.37  | -52417.36 | -36.16 | 1963.46 | 3799.09 | 1835.64 | 93.49  | 65051.52  | 144035.16 | 78983.64  | 121.42 |
| United Arab Emirates         | 12426.72  | 49621.83  | 37195.11  | 299.32 | 43.35   | 264.47  | 221.12  | 510.04 | 1714.39   | 10442.05  | 8727.66   | 509.08 |
| United States Virgin Islands | 213.03    | 142.76    | -70.27    | -32.99 | 3.61    | 3.52    | -0.09   | -2.46  | 120.52    | 96.67     | -23.86    | -19.79 |
| Uruguay                      | 4319.11   | 3381.02   | -938.09   | -21.72 | 94.45   | 64.21   | -30.24  | -32.02 | 2623.25   | 1606.74   | -1016.50  | -38.75 |
| USA                          | 341534.   | 218003.   | -         | -36.17 | 2497.54 | 4486.26 | 1988.72 | 79.63  | 77541.4   | 122497.   | 44956.0   | 57.98  |

|            |         |         |         |        |         |         |         |       |         |         |         |        |
|------------|---------|---------|---------|--------|---------|---------|---------|-------|---------|---------|---------|--------|
|            | 90      | 14      | 123531. |        |         |         |         |       | 4       | 49      | 5       |        |
|            |         |         | 76      |        |         |         |         |       |         |         |         |        |
| Uzbekistan | 364657. | 399796. | 35138.6 | 9.64   | 1583.87 | 2599.36 | 1015.49 | 64.11 | 74738.9 | 99925.5 | 25186.6 | 33.70  |
|            | 99      | 59      | 0       |        |         |         |         |       | 2       | 6       | 4       |        |
| Vanuatu    | 4360.70 | 4410.79 | 50.09   | 1.15   | 16.87   | 26.97   | 10.10   | 59.86 | 646.59  | 978.48  | 331.89  | 51.33  |
| Venezuela  | 51409.3 | 53908.6 | 2499.29 | 4.86   | 242.21  | 283.34  | 41.13   | 16.98 | 8384.70 | 8648.75 | 264.05  | 3.15   |
|            | 8       | 7       |         |        |         |         |         |       |         |         |         |        |
| Vietnam    | 205235  | 191107  | -       | -6.88  | 7443.32 | 7602.77 | 159.45  | 2.14  | 232074. | 240613. | 8538.92 | 3.68   |
|            | 7.31    | 6.17    | 141281. |        |         |         |         |       | 16      | 08      |         |        |
|            |         |         | 14      |        |         |         |         |       |         |         |         |        |
| Yemen      | 374261. | 563409. | 189148. | 50.54  | 1075.31 | 981.53  | -93.78  | -8.72 | 40484.8 | 32866.3 | -       | -18.82 |
|            | 09      | 86      | 77      |        |         |         |         |       | 3       | 2       | 7618.51 |        |
| Zambia     | 228459. | 333596. | 105136. | 46.02  | 623.34  | 867.70  | 244.37  | 39.20 | 22453.5 | 33570.1 | 11116.6 | 49.51  |
|            | 30      | 20      | 90      |        |         |         |         |       | 7       | 8       | 1       |        |
| Zimbabwe   | 373135. | 321710. | -       | -13.78 | 802.91  | 861.38  | 58.47   | 7.28  | 28393.1 | 32152.9 | 3759.87 | 13.24  |
|            | 16      | 91      | 51424.2 |        |         |         |         |       | 2       | 9       |         |        |
|            |         |         | 5       |        |         |         |         |       |         |         |         |        |

**Table S6** Country-wise EAPC of ASIR, ASMR and ASDR of hepatitis B from 1990 to 2019

| location       | EAPC-<br>ASIR | UCI   | LCI   | EAPC-<br>ASMR | UCI   | LCI   | EAPC-<br>ASDR | UCI   | LCI   |
|----------------|---------------|-------|-------|---------------|-------|-------|---------------|-------|-------|
| Afghanistan    | -0.85         | -0.71 | -0.99 | -2.32         | -1.90 | -2.74 | -2.49         | -2.06 | -2.91 |
| Albania        | -2.01         | -1.91 | -2.12 | -3.98         | -3.43 | -4.54 | -3.74         | -3.22 | -4.26 |
| Algeria        | -1.68         | -1.53 | -1.83 | -3.39         | -3.09 | -3.68 | -3.60         | -3.34 | -3.86 |
| American Samoa | -0.35         | -0.24 | -0.45 | -0.13         | -0.05 | -0.20 | -0.10         | -0.01 | -0.19 |

---

|                        |       |       |       |       |       |       |       |       |       |
|------------------------|-------|-------|-------|-------|-------|-------|-------|-------|-------|
| Andorra                | -2.38 | -2.24 | -2.52 | -1.68 | -1.52 | -1.84 | -1.81 | -1.66 | -1.96 |
| Angola                 | -1.00 | -0.89 | -1.11 | -2.10 | -1.92 | -2.28 | -2.17 | -2.01 | -2.33 |
| Antigua and Barbuda    | -1.84 | -1.74 | -1.94 | -4.60 | -4.14 | -5.07 | -4.80 | -4.34 | -5.27 |
| Argentina              | -0.97 | -0.89 | -1.04 | -1.82 | -1.60 | -2.04 | -2.06 | -1.87 | -2.25 |
| Armenia                | -1.85 | -1.73 | -1.97 | 1.53  | 2.30  | 0.77  | 0.93  | 1.63  | 0.24  |
| Australia              | -1.53 | -1.43 | -1.63 | -0.91 | -0.70 | -1.13 | -0.95 | -0.75 | -1.14 |
| Austria                | -1.98 | -1.81 | -2.16 | -3.50 | -3.12 | -3.89 | -3.95 | -3.56 | -4.33 |
| Azerbaijan             | -0.77 | -0.63 | -0.91 | -0.48 | 0.25  | -1.20 | -1.15 | -0.53 | -1.78 |
| Bahamas                | -1.36 | -1.20 | -1.52 | -3.72 | -3.45 | -3.98 | -3.72 | -3.43 | -4.00 |
| Bahrain                | -2.12 | -2.00 | -2.24 | -4.39 | -3.95 | -4.82 | -4.55 | -4.08 | -5.03 |
| Bangladesh             | -1.33 | -1.20 | -1.45 | -3.96 | -3.51 | -4.40 | -4.30 | -3.94 | -4.66 |
| Barbados               | -1.55 | -1.43 | -1.67 | -2.93 | -2.67 | -3.19 | -3.15 | -2.90 | -3.41 |
| Belarus                | -2.35 | -2.13 | -2.57 | 1.19  | 2.49  | -0.10 | 1.36  | 2.76  | -0.01 |
| Belgium                | -1.70 | -1.59 | -1.82 | -1.79 | -1.55 | -2.04 | -2.01 | -1.73 | -2.29 |
| Belize                 | -1.53 | -1.44 | -1.62 | -2.56 | -2.14 | -2.98 | -2.50 | -2.09 | -2.91 |
| Benin                  | -1.10 | -0.97 | -1.22 | -2.20 | -1.94 | -2.47 | -2.07 | -1.81 | -2.32 |
| Bermuda                | -0.27 | -0.25 | -0.29 | -3.66 | -3.00 | -4.33 | -3.72 | -3.04 | -4.40 |
| Bhutan                 | -2.37 | -2.23 | -2.50 | -2.54 | -2.13 | -2.95 | -2.89 | -2.49 | -3.28 |
| Bolivia                | -0.77 | -0.69 | -0.85 | -2.31 | -2.00 | -2.61 | -2.69 | -2.38 | -3.00 |
| Bosnia and Herzegovina | -1.32 | -1.23 | -1.40 | -2.56 | -2.36 | -2.76 | -2.82 | -2.63 | -3.00 |
| Botswana               | -2.34 | -2.26 | -2.42 | -3.75 | -3.20 | -4.31 | -3.66 | -3.09 | -4.22 |
| Brazil                 | -2.89 | -2.68 | -3.10 | -3.68 | -3.28 | -4.07 | -3.88 | -3.47 | -4.28 |
| Brunei Darussalam      | -3.12 | -2.98 | -3.25 | -0.82 | -0.57 | -1.06 | -0.88 | -0.65 | -1.10 |
| Bulgaria               | -2.80 | -2.67 | -2.93 | -1.71 | -1.39 | -2.03 | -1.51 | -1.19 | -1.83 |
| Burkina Faso           | -0.30 | -0.18 | -0.42 | -2.77 | -2.45 | -3.08 | -2.51 | -2.19 | -2.83 |

---

|                                     |       |       |       |       |       |       |       |       |       |
|-------------------------------------|-------|-------|-------|-------|-------|-------|-------|-------|-------|
| Burundi                             | -1.18 | -1.03 | -1.34 | -2.85 | -2.39 | -3.30 | -2.83 | -2.40 | -3.26 |
| Cabo Verde                          | -1.44 | -1.30 | -1.57 | -0.89 | -0.32 | -1.47 | -1.08 | -0.52 | -1.63 |
| Cambodia                            | -1.51 | -1.34 | -1.68 | -2.10 | -1.73 | -2.47 | -2.31 | -1.96 | -2.66 |
| Cameroon                            | -1.26 | -1.14 | -1.39 | -2.49 | -2.14 | -2.85 | -2.28 | -1.90 | -2.65 |
| Canada                              | -0.73 | -0.69 | -0.78 | 0.56  | 0.66  | 0.45  | 0.49  | 0.59  | 0.39  |
| Central African Republic            | -0.70 | -0.63 | -0.77 | -1.32 | -1.13 | -1.51 | -1.31 | -1.13 | -1.48 |
| Chad                                | -0.59 | -0.54 | -0.65 | -0.37 | -0.17 | -0.57 | -0.24 | 0.03  | -0.52 |
| Chile                               | -0.79 | -0.70 | -0.88 | -2.96 | -2.49 | -3.43 | -3.26 | -2.82 | -3.69 |
| China                               | -2.35 | -2.13 | -2.58 | -4.92 | -4.47 | -5.37 | -5.15 | -4.66 | -5.64 |
| Colombia                            | -2.20 | -2.00 | -2.39 | -2.45 | -2.16 | -2.73 | -2.61 | -2.33 | -2.90 |
| Comoros                             | -1.15 | -1.05 | -1.26 | -1.80 | -1.52 | -2.08 | -1.83 | -1.56 | -2.10 |
| Cook Islands                        | -2.35 | -2.15 | -2.55 | -1.80 | -1.56 | -2.05 | -1.64 | -1.37 | -1.91 |
| Costa Rica                          | -1.80 | -1.68 | -1.91 | -2.21 | -1.86 | -2.55 | -2.43 | -2.06 | -2.79 |
| Cote d'Ivoire                       | -1.55 | -1.46 | -1.64 | -2.34 | -2.13 | -2.55 | -2.22 | -2.03 | -2.41 |
| Croatia                             | -2.09 | -2.00 | -2.19 | -4.19 | -3.70 | -4.69 | -4.50 | -4.01 | -5.00 |
| Cuba                                | -2.59 | -2.43 | -2.76 | -3.30 | -2.17 | -4.41 | -3.29 | -2.20 | -4.37 |
| Cyprus                              | -2.75 | -2.70 | -2.79 | -3.41 | -3.09 | -3.73 | -3.23 | -2.95 | -3.51 |
| Czech Republic                      | -1.68 | -1.53 | -1.84 | -2.30 | -1.69 | -2.91 | -2.48 | -1.87 | -3.09 |
| Democratic Republic of the<br>Congo | -0.45 | -0.28 | -0.62 | -1.94 | -1.61 | -2.27 | -1.74 | -1.42 | -2.07 |
| Denmark                             | -0.08 | -0.04 | -0.13 | -0.54 | -0.21 | -0.87 | -1.20 | -0.87 | -1.53 |
| Djibouti                            | -0.92 | -0.84 | -1.01 | -1.11 | -0.79 | -1.44 | -1.19 | -0.86 | -1.52 |
| Dominica                            | -1.09 | -0.91 | -1.26 | -3.22 | -2.87 | -3.57 | -3.34 | -3.01 | -3.66 |
| Dominican Republic                  | -1.21 | -1.12 | -1.30 | -1.96 | -1.48 | -2.44 | -2.06 | -1.54 | -2.59 |
| Ecuador                             | -0.80 | -0.71 | -0.90 | -1.43 | -1.09 | -1.77 | -2.06 | -1.71 | -2.41 |



|                   |       |       |       |       |       |       |       |       |       |
|-------------------|-------|-------|-------|-------|-------|-------|-------|-------|-------|
| Egypt             | -1.48 | -1.35 | -1.61 | -2.50 | -2.31 | -2.68 | -2.47 | -2.31 | -2.64 |
| El Salvador       | -2.15 | -2.07 | -2.23 | -3.34 | -2.99 | -3.70 | -3.56 | -3.20 | -3.92 |
| Equatorial Guinea | -0.38 | -0.33 | -0.42 | -2.84 | -2.59 | -3.10 | -3.17 | -2.89 | -3.46 |
| Eritrea           | -1.74 | -1.60 | -1.89 | -1.75 | -1.21 | -2.30 | -1.76 | -1.24 | -2.27 |
| Estonia           | -1.79 | -1.61 | -1.98 | -0.53 | 0.61  | -1.66 | -0.64 | 0.56  | -1.82 |
| Eswatini          | -2.13 | -2.01 | -2.24 | 0.08  | 0.82  | -0.66 | 0.31  | 1.06  | -0.44 |
| Ethiopia          | -1.06 | -0.95 | -1.17 | -1.22 | -1.07 | -1.37 | -1.56 | -1.42 | -1.70 |
| Fiji              | -2.23 | -1.97 | -2.50 | -1.00 | -0.69 | -1.31 | -0.99 | -0.67 | -1.31 |
| Finland           | -0.17 | -0.14 | -0.20 | 1.43  | 1.80  | 1.06  | 1.16  | 1.56  | 0.77  |
| France            | -1.27 | -1.18 | -1.36 | -2.22 | -2.03 | -2.40 | -2.40 | -2.21 | -2.59 |
| Gabon             | -1.38 | -1.30 | -1.46 | -2.01 | -1.71 | -2.31 | -2.16 | -1.88 | -2.45 |
| Gambia            | -2.25 | -2.16 | -2.34 | -0.80 | -0.60 | -1.00 | -0.68 | -0.47 | -0.89 |
| Georgia           | -1.00 | -0.85 | -1.14 | -0.42 | -0.14 | -0.71 | 0.00  | 0.32  | -0.32 |
| Germany           | -1.42 | -1.33 | -1.50 | -3.35 | -3.07 | -3.63 | -3.84 | -3.54 | -4.14 |
| Ghana             | -1.37 | -1.21 | -1.54 | -2.51 | -2.28 | -2.74 | -2.39 | -2.17 | -2.60 |
| Greece            | -1.70 | -1.64 | -1.77 | -0.84 | -0.75 | -0.92 | -0.51 | -0.42 | -0.60 |
| Greenland         | -0.39 | -0.34 | -0.44 | 0.40  | 0.49  | 0.30  | 0.17  | 0.27  | 0.07  |
| Grenada           | -1.69 | -1.61 | -1.76 | -4.57 | -4.16 | -4.98 | -4.72 | -4.30 | -5.14 |
| Guam              | -0.44 | -0.34 | -0.54 | -0.33 | -0.13 | -0.53 | 0.18  | 0.31  | 0.06  |
| Guatemala         | -1.28 | -1.16 | -1.40 | -2.74 | -2.47 | -3.00 | -2.84 | -2.58 | -3.11 |
| Guinea            | -0.50 | -0.43 | -0.58 | -0.41 | -0.22 | -0.61 | -0.33 | -0.10 | -0.55 |
| Guinea-Bissau     | -0.80 | -0.74 | -0.86 | -1.03 | -0.87 | -1.19 | -0.99 | -0.80 | -1.19 |
| Guyana            | -1.30 | -1.12 | -1.47 | -2.79 | -2.41 | -3.16 | -2.81 | -2.44 | -3.18 |
| Haiti             | -0.61 | -0.44 | -0.78 | -1.38 | -1.23 | -1.54 | -1.47 | -1.30 | -1.63 |
| Honduras          | -1.71 | -1.64 | -1.77 | -0.85 | -0.61 | -1.08 | -1.38 | -1.13 | -1.62 |

---

|            |       |       |       |       |       |       |       |       |       |
|------------|-------|-------|-------|-------|-------|-------|-------|-------|-------|
| Hungary    | -0.15 | -0.14 | -0.16 | -3.91 | -3.49 | -4.32 | -4.53 | -4.06 | -5.01 |
| Iceland    | -0.27 | -0.23 | -0.30 | -0.43 | -0.34 | -0.52 | -0.58 | -0.48 | -0.68 |
| India      | -1.09 | -0.96 | -1.21 | -0.32 | -0.10 | -0.55 | -0.24 | 0.03  | -0.50 |
| Indonesia  | -1.45 | -1.29 | -1.60 | -1.73 | -1.46 | -2.01 | -2.29 | -2.00 | -2.58 |
| Iran       | -2.95 | -2.82 | -3.08 | -3.18 | -2.84 | -3.51 | -3.25 | -2.92 | -3.57 |
| Iraq       | -2.14 | -2.05 | -2.24 | -1.70 | -1.51 | -1.89 | -1.84 | -1.68 | -2.00 |
| Ireland    | -1.18 | -1.00 | -1.35 | 1.55  | 2.04  | 1.06  | 1.53  | 2.08  | 0.98  |
| Israel     | -2.11 | -2.00 | -2.22 | -2.94 | -2.49 | -3.39 | -2.96 | -2.57 | -3.34 |
| Italy      | -4.72 | -4.60 | -4.85 | -3.48 | -3.25 | -3.71 | -3.62 | -3.39 | -3.86 |
| Jamaica    | -1.55 | -1.40 | -1.70 | -2.18 | -1.79 | -2.57 | -2.27 | -1.87 | -2.67 |
| Japan      | -0.85 | -0.77 | -0.94 | -2.60 | -2.37 | -2.83 | -2.96 | -2.69 | -3.22 |
| Jordan     | -3.46 | -3.40 | -3.52 | -4.37 | -3.95 | -4.78 | -4.51 | -4.08 | -4.93 |
| Kazakhstan | -1.98 | -1.84 | -2.12 | -0.05 | 0.83  | -0.93 | -0.22 | 0.82  | -1.24 |
| Kenya      | -1.48 | -1.18 | -1.78 | -1.07 | -0.48 | -1.66 | -0.92 | -0.33 | -1.51 |
| Kiribati   | -1.10 | -0.94 | -1.26 | -2.20 | -2.05 | -2.36 | -2.17 | -2.02 | -2.32 |
| Kuwait     | -3.17 | -3.02 | -3.32 | -1.83 | -1.52 | -2.14 | -2.35 | -2.04 | -2.65 |
| Kyrgyzstan | -1.54 | -1.38 | -1.70 | -1.17 | -0.24 | -2.09 | -1.19 | -0.28 | -2.08 |
| Laos       | -1.00 | -0.83 | -1.17 | -2.63 | -2.53 | -2.73 | -2.88 | -2.78 | -2.97 |
| Latvia     | -2.18 | -2.04 | -2.32 | -1.67 | -0.85 | -2.48 | -2.21 | -1.47 | -2.94 |
| Lebanon    | -1.40 | -1.33 | -1.47 | -2.59 | -2.44 | -2.75 | -2.63 | -2.44 | -2.82 |
| Lesotho    | -1.46 | -1.33 | -1.58 | -0.20 | 0.26  | -0.66 | -0.07 | 0.38  | -0.51 |
| Liberia    | -0.82 | -0.70 | -0.95 | -1.75 | -1.56 | -1.94 | -1.75 | -1.57 | -1.93 |
| Libya      | -1.89 | -1.82 | -1.96 | -3.14 | -2.88 | -3.39 | -3.10 | -2.86 | -3.33 |
| Lithuania  | -2.07 | -1.92 | -2.23 | 0.75  | 1.92  | -0.41 | 0.85  | 2.08  | -0.37 |
| Luxembourg | -1.81 | -1.70 | -1.91 | -3.52 | -3.13 | -3.92 | -3.79 | -3.41 | -4.17 |

---

|                                  |       |       |       |       |       |       |       |       |       |
|----------------------------------|-------|-------|-------|-------|-------|-------|-------|-------|-------|
| Macedonia                        | -1.11 | -0.99 | -1.22 | -1.01 | -0.64 | -1.38 | -1.23 | -0.87 | -1.58 |
| Madagascar                       | -1.49 | -1.33 | -1.64 | -2.51 | -2.09 | -2.93 | -2.50 | -2.13 | -2.86 |
| Malawi                           | -1.21 | -1.04 | -1.38 | -3.31 | -2.75 | -3.86 | -3.22 | -2.66 | -3.78 |
| Malaysia                         | -1.56 | -1.44 | -1.68 | -1.01 | -0.77 | -1.25 | -1.04 | -0.88 | -1.19 |
| Maldives                         | -2.13 | -2.07 | -2.18 | -4.05 | -3.77 | -4.33 | -4.35 | -4.01 | -4.69 |
| Mali                             | -0.56 | -0.49 | -0.64 | -2.46 | -2.23 | -2.68 | -2.41 | -2.21 | -2.61 |
| Malta                            | -2.34 | -2.21 | -2.47 | -2.55 | -2.18 | -2.91 | -2.43 | -2.08 | -2.78 |
| Marshall Islands                 | -1.35 | -1.19 | -1.52 | -1.81 | -1.76 | -1.86 | -1.78 | -1.74 | -1.83 |
| Mauritania                       | -1.31 | -1.21 | -1.41 | -2.86 | -2.78 | -2.95 | -2.82 | -2.75 | -2.90 |
| Mauritius                        | -1.94 | -1.77 | -2.11 | -4.69 | -4.11 | -5.27 | -4.79 | -4.20 | -5.38 |
| Mexico                           | -2.66 | -2.51 | -2.82 | -2.75 | -2.36 | -3.13 | -3.07 | -2.66 | -3.47 |
| Micronesia (Federated States of) | -2.01 | -1.89 | -2.13 | -1.85 | -1.52 | -2.17 | -1.86 | -1.56 | -2.15 |
| Moldova                          | -1.39 | -1.30 | -1.48 | -3.39 | -2.84 | -3.94 | -3.47 | -2.96 | -3.99 |
| Monaco                           | -2.52 | -2.39 | -2.66 | -0.30 | 0.02  | -0.62 | -0.48 | -0.16 | -0.79 |
| Mongolia                         | -1.70 | -1.58 | -1.82 | -0.18 | 0.00  | -0.36 | -0.82 | -0.68 | -0.95 |
| Montenegro                       | -1.23 | -1.07 | -1.39 | -0.68 | -0.22 | -1.13 | -0.87 | -0.41 | -1.32 |
| Morocco                          | -1.73 | -1.62 | -1.84 | -3.04 | -2.88 | -3.19 | -3.25 | -3.11 | -3.40 |
| Mozambique                       | -1.67 | -1.50 | -1.84 | -1.74 | -1.37 | -2.10 | -1.53 | -1.18 | -1.88 |
| Myanmar                          | -1.09 | -0.96 | -1.21 | -1.93 | -1.60 | -2.25 | -2.00 | -1.68 | -2.31 |
| Namibia                          | -1.42 | -1.30 | -1.53 | -1.27 | -0.88 | -1.65 | -1.23 | -0.83 | -1.62 |
| Nauru                            | -1.38 | -1.17 | -1.59 | -1.77 | -1.41 | -2.13 | -1.78 | -1.45 | -2.12 |
| Nepal                            | -1.12 | -1.02 | -1.23 | -3.44 | -3.12 | -3.75 | -3.84 | -3.51 | -4.16 |
| Netherlands                      | -0.64 | -0.52 | -0.77 | -0.69 | -0.44 | -0.94 | -0.85 | -0.61 | -1.09 |
| New Zealand                      | -2.55 | -2.48 | -2.61 | -0.03 | 0.13  | -0.19 | -0.12 | 0.02  | -0.26 |

---

|                          |       |       |       |       |       |       |       |       |       |
|--------------------------|-------|-------|-------|-------|-------|-------|-------|-------|-------|
| Nicaragua                | -2.37 | -2.30 | -2.45 | -1.53 | -1.24 | -1.82 | -1.82 | -1.57 | -2.06 |
| Niger                    | -0.78 | -0.72 | -0.85 | -1.29 | -1.12 | -1.47 | -1.26 | -1.10 | -1.43 |
| Nigeria                  | -1.20 | -1.08 | -1.31 | -1.06 | -0.86 | -1.26 | -1.23 | -1.07 | -1.39 |
| Niue                     | -2.67 | -2.39 | -2.94 | -2.03 | -1.77 | -2.30 | -2.19 | -1.94 | -2.45 |
| North Korea              | -1.43 | -1.30 | -1.56 | -1.85 | -1.70 | -1.99 | -1.94 | -1.82 | -2.06 |
| Northern Mariana Islands | -0.10 | -0.02 | -0.17 | -1.13 | -1.02 | -1.25 | -1.20 | -1.09 | -1.31 |
| Norway                   | -2.50 | -2.16 | -2.85 | -1.40 | -1.03 | -1.76 | -1.61 | -1.25 | -1.96 |
| Oman                     | -3.36 | -3.28 | -3.44 | -1.99 | -1.53 | -2.44 | -2.21 | -1.80 | -2.62 |
| Pakistan                 | -1.02 | -0.84 | -1.21 | -0.73 | -0.61 | -0.86 | -0.79 | -0.66 | -0.92 |
| Palau                    | -2.03 | -1.84 | -2.21 | -1.23 | -1.03 | -1.44 | -1.09 | -0.91 | -1.27 |
| Palestine                | -2.86 | -2.68 | -3.03 | -2.78 | -2.42 | -3.14 | -2.75 | -2.40 | -3.09 |
| Panama                   | -1.82 | -1.71 | -1.92 | -2.01 | -1.80 | -2.22 | -2.23 | -1.99 | -2.47 |
| Papua New Guinea         | -1.26 | -1.13 | -1.38 | -1.14 | -1.09 | -1.19 | -1.30 | -1.25 | -1.35 |
| Paraguay                 | -1.25 | -1.13 | -1.37 | -1.41 | -0.98 | -1.83 | -1.36 | -0.95 | -1.77 |
| Peru                     | -0.66 | -0.58 | -0.73 | -3.41 | -3.19 | -3.62 | -3.63 | -3.41 | -3.85 |
| Philippines              | -2.27 | -2.10 | -2.44 | -2.79 | -2.55 | -3.03 | -2.90 | -2.67 | -3.12 |
| Poland                   | -5.06 | -4.79 | -5.32 | -2.94 | -2.64 | -3.24 | -2.40 | -2.03 | -2.77 |
| Portugal                 | -2.45 | -2.33 | -2.58 | -4.06 | -3.82 | -4.31 | -4.29 | -4.02 | -4.57 |
| Puerto Rico              | -2.41 | -2.28 | -2.54 | -3.88 | -3.48 | -4.28 | -4.13 | -3.73 | -4.53 |
| Qatar                    | -1.64 | -1.54 | -1.75 | -1.74 | -1.39 | -2.08 | -2.46 | -2.22 | -2.70 |
| Republic of Congo        | -1.70 | -1.55 | -1.85 | -2.10 | -1.80 | -2.40 | -2.23 | -1.94 | -2.51 |
| Romania                  | -2.04 | -1.97 | -2.10 | -2.85 | -2.22 | -3.46 | -3.01 | -2.38 | -3.63 |
| Russia                   | -1.76 | -1.15 | -2.36 | 1.25  | 2.42  | 0.09  | 1.60  | 2.89  | 0.32  |
| Rwanda                   | -1.79 | -1.55 | -2.02 | -3.99 | -3.57 | -4.41 | -4.17 | -3.79 | -4.55 |
| Saint Kitts and Nevis    | -1.72 | -1.54 | -1.91 | -5.48 | -4.87 | -6.08 | -5.81 | -5.18 | -6.44 |

---

|                                  |       |       |       |       |       |       |       |       |       |
|----------------------------------|-------|-------|-------|-------|-------|-------|-------|-------|-------|
| Saint Lucia                      | -1.34 | -1.19 | -1.49 | -4.16 | -3.89 | -4.43 | -4.15 | -3.88 | -4.42 |
| Saint Vincent and the Grenadines | -1.40 | -1.25 | -1.55 | -3.20 | -2.95 | -3.45 | -3.22 | -2.99 | -3.44 |
| Samoa                            | -0.73 | -0.58 | -0.87 | -1.20 | -1.02 | -1.37 | -1.20 | -1.05 | -1.34 |
| San Marino                       | -1.84 | -1.75 | -1.92 | -2.18 | -1.74 | -2.61 | -2.14 | -1.70 | -2.57 |
| Sao Tome and Principe            | -1.42 | -1.29 | -1.55 | -2.12 | -1.70 | -2.53 | -2.20 | -1.78 | -2.62 |
| Saudi Arabia                     | -3.05 | -2.97 | -3.13 | -3.94 | -3.59 | -4.30 | -4.08 | -3.74 | -4.41 |
| Senegal                          | -1.27 | -1.16 | -1.38 | -1.85 | -1.69 | -2.01 | -1.69 | -1.52 | -1.86 |
| Serbia                           | -1.44 | -1.27 | -1.61 | -2.32 | -1.79 | -2.85 | -2.54 | -2.03 | -3.06 |
| Seychelles                       | -1.62 | -1.57 | -1.67 | -2.80 | -2.42 | -3.18 | -2.96 | -2.56 | -3.35 |
| Sierra Leone                     | -1.49 | -1.32 | -1.65 | -2.48 | -2.12 | -2.83 | -2.22 | -1.78 | -2.65 |
| Singapore                        | -2.58 | -2.51 | -2.66 | -1.58 | -1.51 | -1.65 | -2.08 | -1.99 | -2.16 |
| Slovakia                         | -2.00 | -1.86 | -2.14 | -3.06 | -2.52 | -3.61 | -3.16 | -2.61 | -3.71 |
| Slovenia                         | -1.73 | -1.61 | -1.85 | -4.09 | -3.49 | -4.68 | -4.52 | -3.91 | -5.13 |
| Solomon Islands                  | -2.25 | -2.12 | -2.38 | -1.67 | -1.53 | -1.81 | -1.67 | -1.54 | -1.80 |
| Somalia                          | -0.26 | -0.22 | -0.30 | -0.54 | -0.27 | -0.82 | -0.54 | -0.27 | -0.82 |
| South Africa                     | -3.24 | -3.10 | -3.37 | -2.48 | -2.00 | -2.96 | -2.73 | -2.23 | -3.22 |
| South Korea                      | -2.36 | -2.28 | -2.44 | -2.75 | -2.35 | -3.14 | -3.11 | -2.69 | -3.53 |
| South Sudan                      | -0.41 | -0.36 | -0.46 | -0.09 | 0.02  | -0.20 | -0.23 | -0.12 | -0.34 |
| Spain                            | -2.41 | -2.24 | -2.58 | -3.86 | -3.59 | -4.13 | -3.98 | -3.73 | -4.22 |
| Sri Lanka                        | -1.12 | -1.00 | -1.24 | -3.63 | -2.86 | -4.39 | -4.06 | -3.24 | -4.87 |
| Sudan                            | -1.84 | -1.71 | -1.97 | -3.74 | -3.53 | -3.95 | -4.11 | -3.89 | -4.32 |
| Suriname                         | -1.36 | -1.19 | -1.54 | -3.41 | -3.16 | -3.67 | -3.62 | -3.37 | -3.87 |
| Sweden                           | -0.43 | -0.33 | -0.53 | -0.13 | 0.03  | -0.30 | -0.47 | -0.29 | -0.65 |
| Switzerland                      | -0.33 | -0.28 | -0.37 | -0.36 | -0.10 | -0.61 | -0.81 | -0.58 | -1.04 |

---

|                              |       |       |       |       |       |       |       |       |       |
|------------------------------|-------|-------|-------|-------|-------|-------|-------|-------|-------|
| Syria                        | -2.61 | -2.54 | -2.69 | -2.71 | -2.36 | -3.07 | -2.95 | -2.58 | -3.32 |
| Taiwan                       | -2.75 | -2.59 | -2.91 | -3.79 | -3.47 | -4.11 | -3.66 | -3.34 | -3.98 |
| Tajikistan                   | -1.55 | -1.34 | -1.76 | -1.01 | -0.51 | -1.50 | -1.83 | -1.45 | -2.21 |
| Tanzania                     | -1.61 | -1.45 | -1.78 | -2.25 | -1.72 | -2.79 | -2.19 | -1.68 | -2.70 |
| Thailand                     | -2.02 | -1.91 | -2.13 | -1.12 | -0.98 | -1.26 | -1.27 | -1.13 | -1.41 |
| Timor-Leste                  | -1.16 | -1.00 | -1.32 | -1.20 | -1.03 | -1.36 | -1.53 | -1.36 | -1.70 |
| Togo                         | -0.77 | -0.67 | -0.88 | -1.87 | -1.61 | -2.13 | -1.70 | -1.43 | -1.98 |
| Tokelau                      | -0.49 | -0.38 | -0.59 | -1.12 | -1.04 | -1.19 | -1.17 | -1.10 | -1.24 |
| Tonga                        | -2.30 | -2.08 | -2.53 | -1.21 | -1.13 | -1.28 | -1.19 | -1.15 | -1.24 |
| Trinidad and Tobago          | -1.27 | -1.13 | -1.40 | -3.96 | -3.62 | -4.30 | -4.05 | -3.71 | -4.38 |
| Tunisia                      | -2.65 | -2.58 | -2.72 | -2.75 | -2.54 | -2.96 | -2.87 | -2.64 | -3.09 |
| Turkey                       | -1.77 | -1.68 | -1.87 | -3.71 | -3.49 | -3.93 | -4.25 | -4.00 | -4.51 |
| Turkmenistan                 | -1.59 | -1.42 | -1.76 | -0.49 | 0.03  | -1.01 | -0.32 | 0.15  | -0.78 |
| Tuvalu                       | -1.26 | -1.10 | -1.42 | -1.71 | -1.56 | -1.86 | -1.66 | -1.51 | -1.80 |
| Uganda                       | -1.60 | -1.48 | -1.71 | -2.04 | -1.64 | -2.44 | -1.94 | -1.54 | -2.35 |
| UK                           | 0.22  | 0.34  | 0.09  | 2.25  | 2.56  | 1.94  | 2.15  | 2.51  | 1.79  |
| Ukraine                      | -0.77 | -0.23 | -1.31 | 2.14  | 3.35  | 0.95  | 2.58  | 3.89  | 1.30  |
| United Arab Emirates         | -2.44 | -2.32 | -2.57 | -2.15 | -1.93 | -2.37 | -2.03 | -1.83 | -2.24 |
| United States Virgin Islands | -1.74 | -1.69 | -1.80 | -2.19 | -1.72 | -2.65 | -2.38 | -1.93 | -2.82 |
| Uruguay                      | -1.40 | -1.29 | -1.50 | -3.17 | -2.78 | -3.56 | -3.31 | -2.94 | -3.68 |
| USA                          | -2.68 | -2.50 | -2.86 | 0.48  | 0.58  | 0.38  | 0.17  | 0.26  | 0.07  |
| Uzbekistan                   | -1.53 | -1.37 | -1.70 | -0.60 | 0.22  | -1.42 | -1.08 | -0.38 | -1.77 |
| Vanuatu                      | -1.69 | -1.50 | -1.89 | -1.76 | -1.48 | -2.05 | -1.75 | -1.47 | -2.03 |
| Venezuela                    | -1.20 | -1.06 | -1.34 | -2.77 | -2.29 | -3.24 | -2.87 | -2.41 | -3.32 |
| Vietnam                      | -1.77 | -1.65 | -1.88 | -3.34 | -3.12 | -3.56 | -3.30 | -3.08 | -3.52 |

---

---

|          |       |       |       |       |       |       |       |       |       |
|----------|-------|-------|-------|-------|-------|-------|-------|-------|-------|
| Yemen    | -1.60 | -1.52 | -1.68 | -3.79 | -3.59 | -3.99 | -4.05 | -3.88 | -4.22 |
| Zambia   | -1.33 | -1.17 | -1.49 | -2.19 | -1.66 | -2.72 | -2.03 | -1.52 | -2.55 |
| Zimbabwe | -1.19 | -1.08 | -1.31 | -1.93 | -1.55 | -2.31 | -1.64 | -1.27 | -2.01 |

---
